1 Adaptation of the Arizona Cognitive Task Battery for use with the Ts65Dn Mouse Model  
2 (*Mus musculus*) of Down syndrome

3 Michael R. Hunsaker\*

4 Department of Psychology, University of Utah, Salt Lake City, UT

5 Genevieve K. Smith

6 Department of Psychology, University of Utah, Salt Lake City, UT

7 Raymond P. Kesner\*\*

8 Department of Psychology, University of Utah, Salt Lake City, UT

9 Author Note

10 \*Current address: Special Education Department, Granite School District, 2500 S  
11 State Street, Salt Lake City, UT 84115

12 \*\*Please send correspondence and requests for offprint copies to: Raymond P.  
13 Kesner, Department of Psychology, University of Utah

14 The authors wish to acknowledge Dr. Julie R. Korenberg for providing access to  
15 facilities where these experiments were conducted.

16 All authors declare they have no competing financial or professional interests.

17 This research was supported by NIH grant R01HD067731.

Abstract

18

19 We propose and validate a clear strategy to efficiently and comprehensively characterize  
20 neurobehavioral deficits in the Ts65Dn mouse model of Down syndrome. This novel  
21 approach uses neurocognitive theory to design and select behavioral tasks that test specific  
22 hypotheses concerning the results of Down syndrome. In this manuscript we model in  
23 Ts65Dn mice the Arizona Cognitive Task Battery used to study human populations with  
24 Down syndrome. We observed specific deficits for spatial memory, impaired long-term  
25 memory for visual objects, acquisition and reversal of motor responses, reduced motor  
26 dexterity, and impaired adaptive function as measured by nesting and anxiety tasks. The  
27 Ts65Dn mice showed intact temporal ordering, novelty detection, and visual object  
28 recognition with short delays. These results phenocopy the performance of participants  
29 with Down syndrome on the Arizona Cognitive Task Battery. This approach extends the  
30 utility of mouse models of Down syndrome by integrating the expertise of clinical  
31 neurology and cognitive neuroscience into the mouse behavioral laboratory. Further, by  
32 directly emphasizing the reciprocal translation of research between human disease states  
33 and the associated mouse models, we demonstrate that it is possible for both groups to  
34 mutually inform each others' research to more efficiently generate hypotheses and elucidate  
35 treatment strategies.

36 *Keywords:* Down syndrome, Mouse Model, Ts65Dn, Attribute, Spatial Memory,  
37 Spatial Processing, Temporal Processing, Sensory/Perceptual Processing, Executive  
38 Function, Motor Function, Rule-Based Memory

39 Adaptation of the Arizona Cognitive Task Battery for use with the Ts65Dn Mouse Model  
40 (*Mus musculus*) of Down syndrome

41 **Introduction**

42 One reason we propose underlying the lack of direct applicability of mouse model  
43 research for improving the quality of life of people with developmental disabilities is an  
44 unfortunate focus on gross phenotypes that may be either at best secondary to the  
45 mutation or result from mouse-unique factors that do not scale evolutionarily to humans.  
46 Stated more colloquially, it is much easier to cure disease in mice than to translate the  
47 murine research into actually curing human disease. The same general paradigm is  
48 prevalent in research into sequelae resultant to neurodevelopmental/neurodegenerative  
49 genetic diseases. One solution to this difficulty is to specifically design behavioral  
50 paradigms to test in mice what is being tested in human research participants. This  
51 process is called behavioral or neurocognitive endophenotyping (Gottesman & Gould,  
52 2003; Hunsaker, 2012a, 2012b; Simon, 2008).

53 There is a clear difference between identifying a behavioral phenotype and  
54 identifying a behavioral endophenotype. This difference is that to evaluate a behavioral  
55 phenotype, the researcher need only look for a difference in behavior among a  
56 homogeneous group of mutant mice relative to littermate or strain-matched control group.  
57 This main effect is then used as evidence for some kind of behavioral impairment. This  
58 process is akin to using the same battery of standardized neuropsychological tests to  
59 evaluate the behavioral consequences of number of different genetic disorders and then  
60 trying to make inferences about what are the specific profiles of strengths and weaknesses  
61 unique to each disorder. In contrast, to evaluate a behavioral endophenotype in the same  
62 mice, there is a requirement that any behavioral phenotype predictably scale across some  
63 measure: Usually such factors include age, genetic dosage in situations of polymorphic  
64 mutations or chromosomal aneuploidy, or some other experimentally controlled factor that  
65 is altered parametrically (*e.g.*, stress, environmental toxicant exposure, etc.). This process

66 is similar to how experimental psychology or cognitive neuroscience approaches to  
67 studying the behavior of populations carrying genetic mutations. That is, an approach  
68 that emphasizes using hypothesis driven tests that have been designed to evaluate  
69 hypothesized effects within the population being studied, irrespective to performance of  
70 other populations.

71 The importance of finding a behavioral endophenotype is that if there is a  
72 predictable relationship among cognitive performance and gene expression, it can be  
73 assumed that the genetic mutation alters behavioral output; and subsequently, some sort  
74 of relationship between the two exists. Such a finding not only provides a wealth of  
75 information that helps the researcher design future experiments, but also data that are  
76 useful as outcome measures for studies of intervention that alter or even potentially  
77 mitigate some negative impact of the mutation. If there is a more complex relationship  
78 wherein age appears to modulate the relationship between the mutation and behavioral  
79 output, then those data serve not only as outcome measures, but if well enough  
80 understood, could be potentially useful to define risk prodromes to predict future  
81 symptomatology or disease progression (*[cf.]*, Gottesman and Gould (2003)).

82 As a scientific community, we have been able to identify and provide cures for a wide  
83 range mouse models of genetic disorders (*i.e.*, Down Syndrome), but to date these cures  
84 have not proven particularly useful for ameliorating symptoms of human genetic disease:  
85 often failing or providing only marginal effects during early phase clinical trials.  
86 Elucidating behavioral or neurocognitive endophenotypes using tasks designed to test  
87 specific disease-related hypotheses is one proposed solution to mitigate this lack of efficacy  
88 in the mouse model.

89 For these, as well as many other reasons, research into schizophrenia has forced the  
90 field to changed their general approach, and emphasized an endophenotyping approach in  
91 the study of prodromal states associated with schizophrenia onset and symptom  
92 progression (*e.g.*, focusing research on longitudinal analyses of 22q11.2 deletion

93 populations rather than on *de novo* schizophrenia cases of unknown or poorly understood  
94 genetic origin; Gottesman and Gould (2003), Karayiorgou, Simon, and Gogos (2010),  
95 Simon (2008)). By focusing on factors that scale with disease or symptom severity,  
96 researchers have been able to understand far more about schizophrenia and what may  
97 underlie symptom progression than they would otherwise have been able using a  
98 standardized, neuropsychological phenotyping approach.

99       Mouse models often demonstrate phenotypes that are not specifically associated with  
100 any genetic disorder in particular, but are more aptly described as shared clinical  
101 phenotypes that similarly present across a wide array of disorders (*e.g.*, global learning  
102 and memory deficits, dementia, anxiety, depression). The interpretation of such  
103 inconclusive findings is often that the mouse model fails to recapitulate the phenotypes  
104 observed in patients. Unfortunately, these types of findings are analogous to inconsistent  
105 findings in clinical populations when standardized neuropsychological tests are  
106 administered – many different populations show very similar deficits despite  
107 nonoverlapping genetic or developmental disorders. Such inconsistencies often renders  
108 behavioral research into developmental or psychiatric disorders frustrating and such  
109 anomalous findings mask the differences that do exist. Hunsaker (2012a, 2012b, 2013),  
110 Simon (2008) proposed that inconsistent behavioral results observed in clinical populations  
111 as well as mouse models do not infer the lack of cognitive impairments, but rather these  
112 "null" data reflect the often startling insensitivity of the behavioral tasks commonly  
113 employed.

114       In situations where, based on standardized behavioral tasks, mouse models do not  
115 appear to specifically model clinical phenotypes observed in patient populations, one  
116 strategy is to evaluate intermediate- or endophenotypes associated specifically with the  
117 genetic mutation and subserved by neuroanatomical structures disrupted by the mutation.  
118 A similar process applies to studies of human clinical populations when standardized tests  
119 fail to uncover phenotypes that are present, but only manifest at a subclinical level.

120 Endophenotypes are collections of quantitative traits hypothesized to represent risk for  
121 genetic disorders at more biologically (and empirically) tractable levels than the full  
122 clinical phenotype; which often contains little more than profound deficits shared across  
123 various genetic disorders.

124 A behavioral endophenotyping approach facilitates the identification of behavioral  
125 deficits that are clearly associated with both the specific genetic mutation and the  
126 pathological features observed in the clinical populations being modeled – and more  
127 importantly with the pathological/clinical features unique to the population being  
128 modeled. When designed to evaluate such disease-specific hypotheses, behavioral  
129 endophenotypes model quantitative patterns of behavioral deficits that scale with the size  
130 and/or severity of the genetic mutation.

131 The behavioral endophenotyping process deviates from the currently accepted  
132 method for determining behavioral phenotypes. The currently accepted method to  
133 determine phenotypes in clinical populations and mouse models is to use behavioral tasks  
134 that were designed without prior consideration of the pathology and clinical features  
135 present in the population. Far too often an approach such as this is not sufficiently  
136 sensitive to characterize the gene-brain-behavior interactions that underlie disease  
137 pathogenesis. In contrast with the currently utilized approach, behavioral  
138 endophenotyping emphasizes the use of behavioral paradigms that were developed to  
139 specifically evaluate a priori hypotheses concerning the alterations to nominal  
140 gene-brain-behavior interactions identified (or proposed to exist) in a given patient  
141 population using carefully selected tasks designed to identify unique phenotypes within  
142 each model; and thus are more capable of characterizing the neurocognitive consequences  
143 of the specific gene mutations underlying the genetic disorder.

144 In order to design a battery of behavioral/neurocognitive tasks that could be  
145 presented to individuals with Down syndrome across a wide age range in a single testing  
146 session, Edgin et al. (2010) developed and validated the Arizona Cognitive Task Battery

147 (ACTB). What makes this battery different than others that are available at present (*e.g.*,  
148 Cambridge Neuropsychological Testing Automated Battery (CANTAB)) is that the ACTB  
149 has been developed to keep the following issues in mind: 1) when one studies a population  
150 with a neurodevelopmental disease, particularly a chromosomal aneuploidy, there is a very  
151 real possibility of floor effects confounding analyses of behavioral or cognitive task  
152 performance. 2) Additionally, individuals with Down syndrome show language deficits,  
153 limiting the tasks that can be used to test cognitive function without a language confound.  
154 3) Finally, and perhaps most importantly, the ACTB was developed with the goal of  
155 maximizing the sensitivity to identify effects that are present in Down syndrome.

156 The IQ in Down syndrome is typically moderately to severely intellectually disabled  
157 range (*i.e.*, IQ = 25-55) and mental age rarely moves beyond 8 years. Paradoxically, it has  
158 been suggested that early on, Down syndrome only presents with a mild to moderate  
159 intellectual disability (*i.e.*, 55-70), but with age the IQ drops as mental age no longer  
160 increases with chronological age (Edgin et al., 2010; Virji-Babul, Kerns, Zhou, Kapur, &  
161 Shiffrar, 2006).

162 It has been hypothesized that visual-spatial abilities appear to be normal in Down  
163 syndrome. However, this appears to be something of an artifact when visual-spatial  
164 memory is directly compared to auditory and verbal performance. In tests specifically  
165 assessing visual and spatial abilities in Down syndrome, there is a clear deficit relative to  
166 typically developing or age matched control populations (Edgin et al., 2010; Edgin, Mason,  
167 Spano, Fernandez, & Nadel, 2012; Pennington, Moon, Edgin, Stedron, & Nadel, 2003).

168 Within the memory domain, Down syndrome results in deficits for digit or word span  
169 as well as general memory deficits with long delays prior to recall. Working memory,  
170 specifically verbal working memory, is disrupted in Down syndrome (Edgin, Spano, Kawa,  
171 & Nadel, 2014; Pennington et al., 2003; Stedron, Sahni, & Munakata, 2005; Vicari,  
172 Bellucci, & Carlesimo, 2005). For visual and spatial memory, it appears that Down  
173 syndrome results in specific memory deficits when memory span is increased (Carretti &

174 Lanfranchi, 2010; Lanfranchi, Carretti, Spano, & Cornoldi, 2009; Silvia Lanfranchi,  
175 Cornoldi, Vianello, & Conners, 2004). Again, as suggested by the language deficits, it has  
176 been shown that individuals with Down syndrome have greater impairments for verbal  
177 than visual-spatial span. Down syndrome also results in long-term memory deficits  
178 (Pennington et al., 2003; Vicari, 2006).

179 Despite these memory deficits, implicit memory and perceptual priming appear to be  
180 normal (Pennington et al., 2003; Vicari, 2006). This pattern suggests that there is an  
181 explicit memory deficit in Down syndrome, meaning that when memory requires temporal  
182 or spatial processing, there is a deficit. This has implicated hippocampus and medial  
183 temporal lobe function in Down syndrome pathology, as well as the prefrontal cortex for  
184 working memory. Implicit memory, dependent upon different brain areas (*e.g.*, parietal  
185 cortex), appears to be spared, if not slightly facilitated in Down syndrome compared to  
186 other cognitive domains (*i.e.*, word stem or perceptual priming tasks).

187 It has been shown that motor development in Down syndrome is slower than age and  
188 mental age matched peers. Intriguingly, early motor markers like rolling and sitting up  
189 have been shown to be only very subtly slowed in Down syndrome, but crawling and  
190 walking has been shown to be more dramatically delayed. Despite this delay, it does  
191 appear that children with Down syndrome develop through the same milestones as  
192 typically developing children, these milestones just occur dramatically later in  
193 development. Motor skill development appear to show the same developmental delays as  
194 these early markers of motor abilities (Connolly & Michael, 1986; Frith & Frith, 1974;  
195 Gemus et al., 2002; Rast & Harris, 1985; Vicari, 2006; Virji-Babul et al., 2006).

196 To date, the majority of behavioral assays used to test the behavioral phenotype of  
197 the mouse models of Down syndrome have focused on spatial memory. More specifically,  
198 focus has been placed on the Morris water maze test of spatial memory (Escorihuela et al.,  
199 1995; Reeves et al., 1995; Sago et al., 1998). Later experiments have focused on novel  
200 object recognition at short and long delays as a proxy for general memory deficits observed



201 across wide range of mouse disease models (Faizi et al., 2011). As a measure of executive  
202 function or rostral cortical function, spontaneous alternation has been used  
203 (A. M. Kleschevnikov et al., 2012; A. M. Kleschevnikov et al., 2004). The majority of  
204 motor tests use the rotarod or locomotor behavior in an open field as the primary measure  
205 (Faizi et al., 2011).

206 In this study we propose and then evaluate a clear strategy to efficiently and  
207 comprehensively characterize neurobehavioral deficits in the Ts65Dn mouse model of Down  
208 syndrome by developing a mouse variant of the Arizona Cognitive Task Battery (Mouse  
209 Cognitive Task Battery; mCTB). This approach uses neurocognitive theory to design and  
210 select behavioral tasks that test specific hypotheses concerning the genetic disorder being  
211 studied—specifically those proposed as part of the Arizona Cognitive Task Battery (ACTB)  
212 used to study human populations with Down syndrome (Edgin et al., 2010; Hunsaker,  
213 2012a).

214 This approach specifically relies on known anatomical data regarding human and  
215 mouse model brain function as important considerations in task design and selection,  
216 similar to the ACTB (Edgin et al., 2010). This approach extends the utility of mouse  
217 models by integrating the expertise of clinical neurology and cognitive neuroscience into  
218 the mouse behavioral laboratory. Further, by directly emphasizing the reciprocal  
219 translation of research between human disease states and the associated mouse models, we  
220 demonstrate that it is possible for both groups to mutually inform each others' research to  
221 more efficiently generate hypotheses and elucidate treatment strategies (*cf.*, Hunsaker,  
222 2012a, 2016).

## 223 **Materials and Methods**

### 224 **Animals**

225 In this study, 10 segmentally trisomic Ts(1716)65Dn (Ts65Dn) male mice and 10  
226 age-matched wildtype littermates were obtained from Jackson Laboratories (Bar Harbor,

227 ME) and tested at 5-7 months of age, weighing 33 +/- 5.2g (SD). Ten mice per group was  
228 chosen as the minimum number of mice required to obtain a reliable behavioral result  
229 based on a predictive power analysis using data from similar tasks reported by previous  
230 studies using the CGG Knock-In and *Fmr1* knockout mouse models *cf.*, Hunsaker (2012a,  
231 2013). The Ts65Dn/DnJ stock, commercially available from Jackson Laboratory  
232 (B6EiC3Sn.BLiA-Ts(1716)65Dn/DnJ), is homozygous for the wildtype allele for retinal  
233 degeneration. The stock is maintained by repeated backcrossing of Ts65Dn females to  
234 B6EiC3H F1 hybrid males derived from a new congenic strain of C3H mice. This new  
235 congenic strain (C3Sn.BLiA-Pde6b+) lacks the blindness causing recessive mutant allele.  
236 Animals were kept on a 12-h light/dark cycle, in a temperature and humidity controlled  
237 environment with *ad libitum* access to food and water. During no point in experimentation  
238 was food deprivation used. Care was taken to assure mice showed motivation to seek  
239 sucrose pellet rewards. All behavioral tests were conducted during the light portion of the  
240 cycle (06:00-18:00). Mice were housed in same-genotype groups of 2-3 per cage. Animal  
241 care and experimental testing procedures conformed to NIH, IACUC, and AALAC  
242 standards and protocols.

### 243 **Experimental Design for Behavioral Testing**

244 The week prior to testing, all animals were handled daily for 15 min sessions and  
245 given an opportunity to habituate to a clear and red apparatus for at least 15 min each  
246 and acclimate to sucrose pellet rewards. It was verified that prior to the end of this  
247 training period that mice consumed sucrose pellets as soon as placed on the apparatus.  
248 Behavioral tasks emphasizing exploratory behaviors were presented in a  
249 pseudo-randomized order between mice (randomized within the Ts65Dn mice and a 2N  
250 wildtype littermate was yoked to a given Ts65Dn mouse to account for any potential task  
251 order effects), followed by spontaneous alternation and motor tasks, then response and  
252 reversal learning tasks. The 2N wildtype mice were the same age (within 15 days of age)

253 as the Ts65Dn mice.

254 After these tasks, mice received training on the cheeseboard, and then finally were  
255 presented with test designed to evaluate quality of life/adaptive functional measures to  
256 reduce the influence of any anxiety measures on later task performance.

257 To specifically isolate the contribution of spatial and non spatial cues to task  
258 performance, behavioral tasks were run two times, once in a clear box and many extra  
259 maze cues, and a second time in a red box without extra maze cues (Dees & Kesner,  
260 2013). This was done because Smith, Kesner, and Korenberg (2014) noticed that there was  
261 a pattern of deficits in Ts65Dn mice that were better explained by the mice having access  
262 to the extra-maze context than by any specific memory process. As such, they ran every  
263 experiment twice, one time using a clear box that allowed access to extra-maze cues and  
264 another time in a red box that blocked the view of the extra maze cues. They found that  
265 visual object recognition deficits at a 1 hour delay were seen in the clear box experiment,  
266 whereas experiments in the red box showed intact visual object memory at a 1 hour delay.  
267 They attributed this effect to extra-maze or distal context interfering with the visual  
268 object recognition due to interference. Experiments in rats exploring the same effect  
269 revealed similar results, and further unpacked the neural correlates of this effect Dees and  
270 Kesner (2013). The rationale for this procedure comes from work reported by Smith et al.  
271 (2014) in Ts65Dn mice and Edgin et al. (2014) in children with Down syndrome showing  
272 that context is particularly influential during object recognition tasks in children with  
273 Down syndrome relative to typically developing children. In other words, children with  
274 Down syndrome are particularly susceptible to memory interference during cognitive tasks.  
275 For every experiment a novel set of objects were used, such that no mouse ever  
276 encountered the same object during different experiments. At the end of every experiment,  
277 95% ethanol was used to reduce and spread olfactory cues and prevent odor effects  
278 impacting future task performance.

## 279 **Tests of Spatial Attribute**

280 **Spatial Navigation using Cheeseboard.** Apparatus: A white, circular Plexiglas  
281 platform with a series of 2 cm diameter holes centered every 5 cm was used as the  
282 cheeseboard apparatus. The apparatus was placed approximately 1.5 m off the ground in a  
283 space surrounded by extra maze, distal cues to provide a rich spatial context to guide  
284 mouse navigation. Paths taken by the mice were recorded by an overhead camera and  
285 analyzed using Noldus EthoVision software.

286 Method: Each mouse was habituated to the cheeseboard for 30 min the day prior to  
287 experimentation with banana flavored sucrose pellets distributed in each hole (Bio-Serv,  
288 #F07257). All mice consumed sucrose pellets and showed a random foraging pattern prior  
289 to beginning of training. At the beginning of each trial, a single sucrose reward pellet was  
290 placed in one of the holes of the cheeseboard (located within the midpoint of the  
291 North-East, North-West, South-East or South-West quadrant). A mouse was then released  
292 at one of the cardinal points (*e.g.*, North, South, East, or West at the edge of the  
293 cheeseboard) as latency in seconds and distance in centimeters traveled to locate and  
294 consume the reward was recorded. Each day, the mouse received a trial from each of the  
295 four cardinal directions (order randomized between mice and between days within mice).  
296 There were 5 minutes separating each trial for each mouse. After the fourth day of  
297 training, the mice were given a probe trial wherein there was no reward. The search  
298 patterns of the mice were evaluated. This protocol was modified from the original rat  
299 protocol (Kesner, Farnsworth, & DiMattia, 1989) for mice after experiments reported by  
300 Lopez, Hauser, Feldon, Gargiulo, and Yee (2010).

301 **Metric/Coordinate Processing.** Apparatus: The apparatus for these  
302 experiments consisted of a large Plexiglas box 40 cm wide by 40 cm deep with clear walls  
303 40 cm in height and a dark gray floor. An inset made of translucent red Plexiglas 39 cm in  
304 width x 39 cm in height was constructed for easy insertion and removal from the original  
305 clear box, therefore enabling the experimenter to block distal cues in the testing

306 environment when desired. The box was placed on a circular white table 1 m in diameter.  
307 Four distinct two-dimensional black and white cues were placed 30 cm away from each side  
308 of the box (methods after Smith et al. (2014)). Exploration was recorded with an overhead  
309 video camera and the duration of exploration was measured with a stopwatch. Proximal  
310 objects were made from various washable, non-porous materials (plastic, metal, glass,  
311 etc.), ranging 2-7 cm in height and had various color, pattern, and textures to ensure each  
312 object was visually distinct. New objects were used between experiments so mice were  
313 never exposed to the same object during different experiments. To prevent use of olfactory  
314 cues to guide behavior, the boxes and objects were disinfected and deodorized with a  
315 sterilizing cleaning agent after each use. The mouse was presented with entirely novel  
316 object sets for every experiment. All locomotor activity was collected by the Noldus  
317 EthoVision software calibrated to measure to the nearest cm (Noldus USA, North  
318 Carolina).

319 Method: Each mouse had previously been habituated to clear and red experimental  
320 boxes. For the metric/coordinate processing test (Hunsaker, 2012a, 2013; Hunsaker, Kim,  
321 Willemsen, & Berman, 2012; Hunsaker, Wenzel, Willemsen, & Berman, 2009; Kesner  
322 et al., 2014; Smith et al., 2014), two objects were placed in the box separated by 25 cm  
323 (from inner edges) and mice were allowed to explore the objects for 15 minutes. After a 5  
324 min interval during which the mice were covered by an opaque, heavy cup, the objects  
325 were moved closer together to an 8 cm separation and the mouse was allowed to explore  
326 for 5 min. This procedure was carried out in the clear box that allowed the mouse to see  
327 the extra-maze, distal cues as well as in the red box that blocked the ability of the mouse  
328 to see these cues (Dees & Kesner, 2013; Smith et al., 2014). Exploration during the last 5  
329 min of habituation and during the 5 min test session were converted into a ratio value  
330 ranging [-1,1] to control for overall exploration. As such, a ratio value approaching -1 is  
331 interpreted as the mouse showing continued habituation and thus not noticing the change.  
332 A ratio value approaching 1 suggest the mouse dramatically explored the change.

333 **Topological/Categorical Processing.** Apparatus: This experiment used the  
334 same apparatus as the Metric/Coordinate experiment. A similar ratio value was computed  
335 as a dependent measure.

336 Method: Each mouse had previously been habituated to clear and red experimental  
337 boxes. For the topological/categorical processing test (Hunsaker, 2012a, 2013; Hunsaker  
338 et al., 2012; Hunsaker et al., 2009; Kesner et al., 2014; Lee et al., 2009; Smith et al., 2014),  
339 four objects were placed in a square in the box separated by 25 cm (from inner edges) and  
340 mice were allowed to explore the objects for 15 minutes. After a 5 min interval during  
341 which the mice were covered by a heavy cup, the front two objects were transposed, and  
342 the mouse was allowed to explore for 5 min. This procedure was carried out in the clear  
343 box that allowed the mouse to see the extra-maze, distal cues as well as in the red box  
344 that blocked the ability of the mouse to see these cues. Exploration during the last 5 min  
345 of habituation and during the 5 min test session were converted into a ratio value ranging  
346  $[-1,1]$  to control for overall exploration. As such, a ratio value approaching -1 is interpreted  
347 as the mouse showing continued habituation and thus not noticing the change. A ratio  
348 value approaching 1 suggest the mouse dramatically explored the change in the object's  
349 spatial location and/or distance from each other.

350 **Spatial Location Recognition.** Apparatus: This experiment used the same  
351 apparatus as the Metric/Coordinate experiment. A similar ratio value was computed as a  
352 dependent measure using exploration data.

353 Method: Each mouse had previously been habituated to clear and red experimental  
354 boxes. For the location recognition test (Smith et al., 2014), two objects were placed in  
355 the box separated by 25 cm (from inner edges) and mice were allowed to explore the  
356 objects for 15 minutes. After a 5 min interval during which the mice were covered by a  
357 heavy cup, one of the objects was moved at a diagonal to a new location (still 25 cm  
358 separation between the two objects), and the mouse was allowed to explore for 5 min. This  
359 procedure was carried out in the clear box that allowed the mouse to see the extra-maze,

360 distal cues as well as in the red box that blocked the ability of the mouse to see these cues.  
361 Exploration during the last 5 min of habituation and during the 5 min test session were  
362 converted into a ratio value ranging [-1,1] to control for overall exploration. As such, a  
363 ratio value approaching -1 is interpreted as the mouse showing continued habituation and  
364 thus not noticing the change. A ratio value approaching 1 suggest the mouse dramatically  
365 explored the change in which object occupied which spatial location.

### 366 **Tests of Temporal Attribute**

367 **Temporal Ordering for Visual Objects.** Apparatus: This experiment used the  
368 same apparatus as the Metric/Coordinate experiment. A similar ratio value was computed  
369 as a dependent measure.

370 Method: During session 1, two identical copies of a first object (object 1) were placed  
371 at the ends of the box 2.5 cm from the end walls and centered between the long walls  
372 (Hunsaker, 2013; Hunsaker, Goodrich-Hunsaker, Willemsen, & Berman, 2010; Hunsaker  
373 et al., 2012). The mouse was placed in the center of the box facing away from both  
374 objects. The mouse was given 5 min to freely explore the objects. After 5 min, the mouse  
375 was removed to a small holding cup for 5 min. During this time, the first objects were  
376 replaced with two duplicates of a second object (Object 2). For Session 2, the mouse was  
377 again placed in the apparatus and allowed to explore. After 5 min, the mouse was  
378 removed to the holding cup for 5 min and the objects were replaced with two duplicates of  
379 a third object (Object 3). For Session 3, the mouse was given 5 min to explore. After 5  
380 min, the mouse was removed into a small cup for 5 min and an unused copy of the first  
381 and an unused copy of the third object were placed into the box. The mouse was again  
382 placed into the box and allowed to explore the two objects (*i.e.*, Objects 1 and 3) during a  
383 5 min test session. This procedure was carried out in the clear box that allowed the mouse  
384 to see the extra-maze, distal cues as well as in the red box that blocked the ability of the  
385 mouse to see these cues. Exploration of each object during the test session were converted

386 into a ratio value ranging [-1,1] to control for overall exploration. As such, a ratio value  
387 approaching -1 is interpreted as the mouse showing an absolute preference for the third  
388 over the first object. A ratio value approaching 1 suggest the mouse strongly explored the  
389 first over the third object.

#### 390 **Temporal Order Control - Novelty Detection for Visual Objects.**

391 Apparatus: This experiment used the same apparatus as the Metric/Coordinate  
392 experiment. A similar ratio value was computed as a dependent measure.

393 Method: In addition to reflecting impaired temporal ordering, increased exploration  
394 of the first object over the third could also be interpreted as being due to difficulty in  
395 remembering the first object prior to the test session (Hunsaker, 2012a, 2013; Hunsaker  
396 et al., 2010). To minimize and control for such general memory deficits, a novelty  
397 detection of visual objects task was performed. Briefly, on a different day mice received  
398 three sessions during which they were allowed to explore three novel sets of objects  
399 (Objects 4, 5, 6) similarly to the temporal ordering tasks. During the test session, the first  
400 object and a novel fourth object (Object 7) were presented and the mice were allowed 5  
401 min to explore. This procedure was carried out in the clear box that allowed the mouse to  
402 see the extra-maze, distal cues as well as in the red box that blocked the ability of the  
403 mouse to see these cues (*cf.*, Dees and Kesner, 2013; Smith et al., 2014). Exploration of  
404 each object during the test session were converted into a ratio value ranging [-1,1] to  
405 control for overall exploration. As such, a ratio value approaching -1 is interpreted as the  
406 mouse showing an absolute preference for the familiar over the novel object. A ratio value  
407 approaching 1 suggest the mouse strongly explored the novel over the familiar object.

#### 408 **Sensory/Perceptual Attribute**

409 **Feature Ambiguity.** Apparatus: This experiment used the same apparatus as the  
410 Metric/Coordinate experiment. A similar ratio value was computed as a dependent  
411 measure.



412 Method: Each mouse had previously been habituated to clear and red experimental  
413 boxes. For the configural recognition condition (Bartko, Winters, Cowell, Saksida, &  
414 Bussey, 2007; Bussey, Saksida, & Murray, 2002, 2006; Smith et al., 2014), mice were  
415 placed for 15 min in the red box containing two compound objects, A-B and C-D,  
416 separated by 15 cm. Following a 5 min delay under a heavy cup, the mouse underwent a  
417 5-min Test Phase in which one object from the Study Phase remained the same (A-B) and  
418 the other compound object is created from one component of each of the previous familiar  
419 objects, (*e.g.*, A-D). That is, the "novel" object (A-D) was composed of the same elements,  
420 but rearranged into a novel configuration. Therefore, the object is "novel" by virtue of its  
421 configuration, not by its elements, each of which was present in one of the original  
422 compound stimuli. Exploration of each compound object was scored as a single unit.  
423 Exploration during the last 5 min of habituation and during the 5 min test session were  
424 converted into a ratio value ranging [-1,1] to control for overall exploration. As such, a  
425 ratio value approaching -1 is interpreted as the mouse showing continued habituation and  
426 thus not noticing the change. A ratio value approaching 1 suggest the mouse dramatically  
427 explored the change.

428 **Feature Ambiguity Control - Novelty Detection for Configuration of**  
429 **Objects.** Apparatus: This experiment used the same apparatus as the  
430 Metric/Coordinate experiment. A similar ratio value was computed as a dependent  
431 measure.

432 Method: Each mouse had previously been habituated to clear and red experimental  
433 boxes. For the configural recognition condition (Bartko et al., 2007; Bussey et al., 2002,  
434 2006; Smith et al., 2014), mice were placed for 15 min in the red box containing two  
435 compound objects, A-B and C-D, separated by 15 cm. Following a 5 min delay under a  
436 heavy cup, the mouse underwent a 5-min control task during which C-D was replaced by  
437 two never before seen objects (E-F) was also performed. This procedure was carried out in  
438 the clear box that allowed the mouse to see the extra-maze, distal cues as well as in the

439 red box that blocked the ability of the mouse to see these cues. Exploration during the  
440 last 5 min of habituation and during the 5 min test session were converted into a ratio  
441 value ranging  $[-1,1]$  to control for overall exploration. As such, a ratio value approaching -1  
442 is interpreted as the mouse showing continued habituation and thus not noticing the  
443 change. A ratio value approaching 1 suggest the mouse dramatically explored the change.

444 **Object Recognition at 1 and 24 Hour Delays.** Apparatus: This experiment  
445 used the same apparatus as the Metric/Coordinate experiment. A similar ratio value was  
446 computed as a dependent measure.

447 Method: Each mouse had previously been habituated to clear and red experimental  
448 boxes. For the object recognition test (Moore, Deshpande, Stinnett, Seasholtz, & Murphy,  
449 2013; Smith et al., 2014), two objects were placed in the box separated by 25 cm (from  
450 inner edges) and mice were allowed to explore the objects for 15 minutes. After a 5 min  
451 interval during which the mice were covered by a heavy cup, one of the objects was  
452 replaced by a novel object that had never before been experienced by the mouse, and the  
453 mouse was allowed to explore for 5 min. This procedure was carried out in the clear box  
454 that allowed the mouse to see the extra-maze, distal cues as well as in the red box that  
455 blocked the ability of the mouse to see these cues. This procedure was carried out in each  
456 box separately for delays of 1 hour and 24 hours. Exploration during the last 5 min of  
457 habituation and during the 5 min test session were converted into a ratio value ranging  
458  $[-1,1]$  to control for overall exploration. As such, a ratio value approaching -1 is interpreted  
459 as the mouse showing continued habituation and thus not noticing the change. a ratio  
460 value approaching 1 suggest the mouse dramatically explored the change.

#### 461 **Tests of Executive Function**

462 **Spontaneous Alternation.** Apparatus: For this experiment, a Y maze with each  
463 arm measuring 45 cm in length by 30 cm in height with a runway width of 6 cm was used.  
464 It was made from opaque gray Plexiglas to prevent the use of any extra-maze cues to

465 guide behavioral performance. As this was a spontaneous alternation task, no rewards  
466 were provided at the end of the arms of the Y maze.

467 Method: Mice were placed in the stem of a Y maze and allowed to explore (Faizi  
468 et al., 2011; A. M. Kleschevnikov et al., 2012; A. M. Kleschevnikov et al., 2004).

469 Whenever the mouse entered one of the arms of the Y maze with all four limbs their  
470 response was recorded. Upon reaching the end of the arm, the mouse was gently picked up  
471 and replaced in the stem of the Y maze. The number of times the mouse alternated (*i.e.*,  
472 did not repeat the previous turn), was recorded as an alternation.

473 **Response Learning.** Apparatus: For this experiment, a plus maze with each arm  
474 measuring 50 cm in length by 25 cm in height with a runway width of 8 cm was used.  
475 There was a 2 cm diameter depression at the end of the arms wherein a sucrose pellet was  
476 placed to reward a correct response. It was made from opaque gray Plexiglas to prevent  
477 the use of any extra-maze cues to guide behavioral performance. At any time the mouse  
478 was required to make a 90 degree turn to the right or left to make a choice. The remaining  
479 arm was blocked off using a gray Plexiglas block that fit snugly into the arms of the plus  
480 maze.

481 Method: Mice were placed in the stem of a plus maze with one of the arms blocked  
482 off (forming a T maze). Mice were given five trials to determine if there was any  
483 preference for one direction over the other. As no such preference was observed, mice were  
484 randomly assigned the rule to turn right or turn left. Mice received 20 trials per day for 4  
485 days (Bissonette et al., 2008; Ragozzino, Detrick, & Kesner, 1999; Ragozzino, Ragozzino,  
486 Mizumori, & Kesner, 2002). Entry into an arm with all four limbs was recorded as a  
487 choice and mice were not allowed to self correct when they made mistakes. Upon reaching  
488 the end of the arm, the mouse was gently picked up and replaced in the stem of the plus  
489 maze.

490 **Reversal Learning.** Apparatus: This experiment is a continuation of the  
491 Response acquisition experiment and used the same apparatus. For this experiment, the

492 previously rewarded arm was now unrewarded and the previously unrewarded arm was  
493 now rewarded by a sucrose pellet.

494       Method: The day after mice finished training on response learning, they received 80  
495 trials of reversal training (Bissonette et al., 2008; Ragozzino et al., 1999; Ragozzino et al.,  
496 2002). This means that the turn the mice had just learned to make for reward was now  
497 incorrect, rather the mice had to make the opposite turn to receive reward. Upon reaching  
498 the end of the arm, the mouse was gently picked up and replaced in the stem of the plus  
499 maze. Number of previously correct choices made were recorded as errors and error type  
500 was evaluated as perseverative or regressive based on the work of Aggleton and Ragozzino  
501 (Ragozzino et al., 2002; E Clea Warburton, Baird, Morgan, Muir, & Aggleton, 2001;  
502 E. Warburton, Baird, Morgan, Muir, & Aggleton, 2000). Briefly, errors during trials 1-20  
503 were considered perseverative errors (perseverating or inflexibly following a previously  
504 learned rule) and errors during trials 21-40 were considered regressive errors (regressing or  
505 returning to a previously learned rule). Additionally, a behavioral change point algorithm  
506 was used to define the point at which each mouse consistently switched their responses  
507 from the previously learned rule to the new rule. This was done after the work reported by  
508 Diep et al. (2012) by taking the derivative of the learning curve at each point and  
509 evaluating when the derivative significantly changed slope (analysis code available at  
510 [http://www.github.com/mrhunsaker/Change\\_Point](http://www.github.com/mrhunsaker/Change_Point)).

## 511 **Motor Function**

512       **Capellini Handling.** Apparatus: For this experiment, a 250 mL Nalgene beaker  
513 was used as a testing environment to assist in video recording mouse behavior. A small  
514 mirror was set up behind the beaker and the camera was placed to capture a front and  
515 rear view of the mouse to record trials.

516       Method: Mice were habituated over a weekend with approximately 20-30 dried  
517 capellini pasta presented in their cages (Tennant et al., 2010). Each mouse was placed in a

518 250 mL beaker and given a 5 cm piece of dried capellini. Their behaviors while eating  
519 were recorded for an offline analysis of their motor behaviors. Their latency to finish each  
520 piece of pasta was recorded, as were abnormal behaviors including the mouse having its  
521 paws together while eating, losing contact with the pasta with one or both paws, and  
522 using the mouth to pull the pasta rather than using the digits to feed the pasta into the  
523 mouth.

524 **Parallel Rung Walking.** Apparatus: Mice were placed in a box measuring 15 cm  
525 wide by 15 cm deep by 45 cm tall with 1.5 mm diameter parallel rungs making up the  
526 floor. The rungs were designed with same spacing used by Hunsaker et al. (2011).  
527 However, as this was a box rather than a runway, locomotor activity was collected using  
528 the Noldus EthoVision software to evaluate any effects of locomotor activity on motor  
529 coordination.

530 Method: The mice were allowed to freely explore the box for 5 minutes (Cummings,  
531 Engesser-Cesar, Cadena, & Anderson, 2007; Farr, Liu, Colwell, Whishaw, & Metz, 2006;  
532 Hunsaker et al., 2011). The number of times a paw slipped through the parallel rod floor  
533 beyond the wrist or ankle, a "foot slip" error was recorded (protocol simplified after Farr  
534 et al. (2006)). Total number of steps was also recorded to be used as an adjustment factor  
535 in later analyses.

### 536 **Adaptive Function**

537 **Nesting Behaviors.** Apparatus: A 10 cm long piece of 5 cm diameter PVC pipe  
538 capped at one end was used as the apparatus. Sawdust similar to that used as mouse  
539 bedding was used as a nesting substrate.

540 Method: Sawdust was used to fill a 10 cm long piece of 5 cm diameter PVC pipe  
541 that was capped at one end (dry fit, no glue was used). This pipe was placed in a cage  
542 with each mouse and the latency to contact the sawdust in the pipe, the latency to start  
543 digging in the sawdust, and the latency to finalize the nest were recorded (Filali &

544 Lalonde, 2009).

545 **Neophobia.** Apparatus: The home cage of the mouse, a 35 cm diameter metal  
546 platter, and a novel white Plexiglas box measuring 15 cm in all dimension were used to  
547 assess neophagia.

548 Method: Mice were given three neophobia tests (specifically hyperneophagia tests)  
549 based on the work of Bannerman et al. (2002). The first test was in each mouse's home  
550 cage. Each mouse was provided a food they had never encountered (Cheerios cereal) and  
551 the latency for the mouse to take the first bite was recorded. The second test was each  
552 mouse was placed on a large platter in a bright area in the testing room and the latency  
553 for the mouse to take a bite from a reward pellet (familiar food) was recorded. The final  
554 test consisted of each mouse being placed in a novel white box and fed a Cheerio that had  
555 been stored in a sealed container filled with thyme overnight, resulting in a novel food  
556 (Vale-Martinez, Baxter, & Eichenbaum, 2002). Again, latency for the mouse to take the  
557 first bite was recorded.

## 558 **Statistical Methods**

559 **Dependent Measures and Data Visualization.** For the Dry Land Water Maze  
560 on the cheeseboard, mean latency to reach the rewarded location as well as total path  
561 length were collected using the EthoVision software. The learning curves were normalized  
562 to percentage of 1st day latencies and distances to specifically ascertain if there were  
563 differences in the shape of the learning curves.

564 For the probe trial, mean distance from the reward location as well as percent time  
565 in the quadrant of the cheeseboard containing the previously rewarded location were  
566 collected.

567 For all exploratory tasks (Spatial, Temporal, and Sensory/Perceptual tasks), ratio  
568 values were computed after the following formula: Exploration of the object of interest (or  
569 all objects in the 5 min session of interest) minus the exploration of the other objects or

570 last 5 min of the habituation session. This was divided by the sum of all exploration  
571 across both sessions or of both objects. As a formula this is depicted as:  $(A-B)/(A+B)$ .

572 Exploration was defined as the mouse sniffing the object, touching the object with  
573 the paw, rearing toward the object, or whisking at the object. Touching the object with  
574 the trunk or tail or running into an object without stopping to sniff at it was not coded as  
575 exploration. Exploration was collected to the nearest .5 second.

576 For the reversal learning, the number of perseverative errors (continuing old rule)  
577 during the first 20 (1-20) trials were computed. The number of regressive errors (returning  
578 to old rule) were calculated during trials 21-40. A frequentist change point algorithm  
579 developed by Gallistel, Fairhurst, and Balsam (2004) and translated in the R programming  
580 language by Diep et al. (2012) was used to compute the point at which each mouse showed  
581 evidence for having learned to apply the new rule (analysis code available for download at  
582 [http://github.com/mrhunsaker/Change\\_Point](http://github.com/mrhunsaker/Change_Point)). This code takes the derivative of the  
583 learning curve at every point and determines when the slope has significantly changed.  
584 The threshold for significant change was conservatively set at  $p < .001$  ( $p < .05/50$ ) for the  
585 current task.

586 Data were all plotted in DataGraph (4.01 beta, Visual Data Tools, Inc. Chapel Hill,  
587 NC.). Ratio data and computed factors are plotted as bar graphs with all data points  
588 displayed. Repeated data/learning curves are presented as a line graph at the mean of  
589 each block with all data points displayed.

590 **Tests for equal variance and heteroscedasticity.** Prior to statistical analyses,  
591 the data were tested for normalcy (Shapiro-Wilk test) and homoscedacity  
592 (Browne-Forsythe test) to determine if the data met the assumptions for parametric  
593 analyses of variance (ANOVA). Repeated measures were evaluated for sphericity using  
594 Mauchly's test of sphericity and necessary adjustments were made using the Huhn-Feldt  
595 correction using R 3.2.4 (Team, 2014).

596 **Parametric Statistical Analysis.** Once deemed appropriate, further statistical  
597 analyses were performed using parametric analyses of variance (ANOVA). For exploratory  
598 task ratios and computed factors were compared using a one-way ANOVA with groups  
599 (2N control, Ts65Dn). For acquisition tasks wherein learning was quantified across trials  
600 as well as locomotor data, statistical analyses were performed using a mixed model  
601 ANOVA with group (2N control, Ts65Dn) as a between groups factor and block of trials as  
602 a repeated within factor. An analysis was carried out comparing locomotor behaviors  
603 measured by total distance traveled on each trial in cm. In no cases were there group  
604 differences for locomotor activity (all  $p > .31$ ).

605 All results were considered significant at an  $\alpha < .05$  and Power  $(1 - \beta) > .80$ : Analyses  
606 were performed to determine observed power and effect size for all reported effects. Effect  
607 size for all analyses will be reported using the  $\eta^2$  statistic. Statistical analyses were  
608 performed in R 3.2.4 language and environment and observed statistical power was  
609 calculated using both R and the statistical program G\*Power 3 (Faul, Erdfelder, Buchner,  
610 & Lang, 2009; Faul, Erdfelder, Lang, & Buchner, 2007). All reported p values were  
611 adjusted for False Discovery Rate (Benjamini, Drai, Elmer, Kafkafi, & Golani, 2001;  
612 Hunsaker, 2013) using a custom script written in R 3.2.4 (Team, 2014).

## 613 **Results**

### 614 **Spatial Attribute**

615 **Cheeseboard.** To evaluate spatial navigation and general spatial memory, mice  
616 were tested on a dry land version of the Morris water maze (cheeseboard). The Ts65Dn  
617 mice showed deficits relative to 2N control mice for raw latency to find reward (Figure 1a;  
618 groups ( $F(1,76)=185.645$ ,  $p < .0001$ ,  $\eta^2 = .21$ ), no interaction among group and trial block  
619 ( $F(1,76)=0.333$ ,  $p = .566$ ,  $\eta^2 = .03$ )). These deficits are present as well when the data are  
620 adjusted for total latency on trial 1 (groups ( $F(1,76)=48.44$ ,  $p < .0001$ ,  $\eta^2 = .27$ ); Figure 1b)  
621 Ts65Dn mice have impaired learning in the Ts65Dn mice in the adjusted data



622 ( $F(1,76)=14.74$ ,  $p=.00025$   $\eta^2=.19$ ). The same pattern of effects was observed for the data  
623 when evaluated for raw distance covered to find reward (Figure 1c; groups  
624 ( $F(1,76)=88.406$ ,  $p<.0001$   $\eta^2=.23$ ) no interaction among group and block ( $F(1,76)=0.258$ ,  
625  $p=.613$   $\eta^2=.02$ ). Similarly to the latency data, an interaction emerges with Ts65Dn mice  
626 showing a shallower learning curve when the data are adjusted for total distance on trial 1  
627 (groups ( $F(1,76)=25.194$ ,  $p<.0001$   $\eta^2=.19$ ), interaction ( $F(1,76)=3.887$ ,  $p=.0523$   $\eta^2=.11$ );  
628 Figure 1d).

629 During the probe trial (Figure 1), Ts65Dn mice spent significantly less time in the  
630 quadrant where the reward was previously located (Figure 1e,  $F(1,18)=91.25$ ,  $p<.0001$   
631  $\eta^2=.28$ ). Ts65Dn mice also on average were a further distance away from the previously  
632 rewarded spatial location ( $F(1,18)=41.7$ ,  $p<.0001$   $\eta^2=.22$ ; Figure 1f).

633 **Metric/Coordinate processing.** To evaluate coordinate / metric spatial  
634 processing, mice were tested for detection of a metric change (Figure 2a), Ts65Dn mice  
635 showed significant impairments relative to 2N control mice. There was a main effect for  
636 groups for the clear box ( $F(1,18)=39.38$ ,  $p<.0001$   $\eta^2=.37$ ) as well as the red box  
637 ( $F(1,18)=29.94$ ,  $p<.0001$   $\eta^2=.33$ ). Deficits in both the clear and red box suggest that  
638 metric/coordinate processing is specifically impaired in Ts65Dn mice, supporting earlier  
639 reports of dentate gyrus dysfunction in Ts65Dn mice.

640 **Topological/Categorical processing.** To evaluate categorical / topological  
641 spatial processing, mice were tested for detection of a topological change (Figure 2b),  
642 Ts65Dn mice showed significant impairments relative to 2N control mice. There was a  
643 main effect for groups for the clear box ( $F(1,18)=78.52$ ,  $p<.0001$   $\eta^2=.24$ ) but not for the  
644 red box ( $F(1,18)=1.489$ ,  $p=.238$   $\eta^2=.04$ ). Deficits in only the clear box suggests that  
645 topological processing is only impaired when extra-maze cues are present, suggesting a  
646 general spatial memory deficit rather than one specific to topological/categorical  
647 processing.

648 **Location Recognition.** To test general spatial memory, mice were tested for  
649 detection of a change in the spatial location of a visual object (Figure 2c), Ts65Dn mice  
650 showed significant impairments relative to 2N control mice. There was a main effect for  
651 groups for the clear box ( $F(1,18)=36.39$ ,  $p<.0001$   $\eta^2=.28$ ) as well as in the red box  
652 ( $F(1,18)=62.0$ ,  $p<.0001$   $\eta^2=.18$ ), suggesting spatial novelty detection deficits in Ts65Dn  
653 mice.

#### 654 **Temporal Attribute**

655 **Temporal Ordering of Visual Objects.** To test temporal processing / temporal  
656 ordering in Ts65Dn mice, mice were tested for a simple temporal ordering task  
657 (Figure 2d). Ts65Dn mice did not show significant impairments relative to 2N control  
658 mice. There was a main effect for groups for the clear box ( $F(1,18)=68.24$ ,  $p<.0001$   
659  $\eta^2=.26$ ) but not for the red box ( $F(1,18)=2.267$ ,  $p=.149$   $\eta^2=.01$ ). These data suggest that  
660 the presence of spatial cues, but not temporal ordering resulted in deficits in the clear box.  
661 For the novelty detection task run as a control for temporal ordering (Figure 2e), Ts65Dn  
662 mice did not show significant impairments relative to 2N control mice. There was a main  
663 effect for groups for the clear box ( $F(1,18)=82.78$ ,  $p<.0001$   $\eta^2=.21$ ) but not for the red  
664 box ( $F(1,18)=2.909$ ,  $p=.105$   $\eta^2=.05$ ). These data suggest that the presence of spatial cues,  
665 but not temporal ordering or novelty detection resulted in deficits in the clear box.

#### 666 **Sensory/Perceptual Attribute**

667 **Feature Ambiguity.** To test the ability of Ts65Dn mice to discriminate similar  
668 objects that differ only by the configuration of object features, a configural feature  
669 ambiguity test was given (Figure 3a). Ts65Dn mice did not show significant impairments  
670 relative to 2N control mice. There was a main effect for groups for the clear box  
671 ( $F(1,18)=34.13$ ,  $p<.0001$   $\eta^2=.35$ ) but not for the red box ( $F(1,18)=.021$ ,  $p=.984$   $\eta^2=.01$ ).  
672 These data suggest that the presence of spatial cues, but not configural feature ambiguity  
673 resulted in deficits in the clear box. Ts65Dn mice were not impaired in a configural

674 ambiguity control task (Figure 3b). There was a main effect for groups for the clear box  
675 ( $F(1,18)=12.27$ ,  $p=.0025$   $\eta^2=.15$ ) but not for the red box ( $F(1,18)=.012$ ,  $p=.916$   $\eta^2=.01$ ).  
676 These data suggest that the presence of spatial cues, but not configural feature novelty  
677 detection ordering resulted in deficits in the clear box.

678 **Object Recognition after 1 and 24 delays.** Object recognition memory was  
679 tested in Ts65Dn mice using object recognition memory at 1 and 24 hours (Figure 3c),  
680 Ts65Dn mice did not show significant impairments relative to 2N control mice. There was  
681 a main effect for groups for the clear box ( $F(1,18)=29.51$ ,  $p<.0001$   $\eta^2=.19$ ) but not for the  
682 red box ( $F(1,18)=.908$ ,  $p=.353$   $\eta^2=.03$ ). These data suggest that the presence of spatial  
683 cues, but not object recognition resulted in deficits in the clear box. For object recognition  
684 memory at 24 hours (Figure 3d), there was a main effect for groups for the clear box  
685 ( $F(1,18)=46.23$ ,  $p<.0001$   $\eta^2=.22$ ) as well as for the red box ( $F(1,18)=31.36$ ,  $p<.0001$   
686  $\eta^2=.20$ ). These data suggest that at 24 hours, the Ts65Dn mice were unable to retrieve the  
687 memory for the object, whereas they were able to do so at 1 hour.

## 688 **Executive Function**

689 **Spontaneous Alternation.** Spontaneous alternation was used to test working  
690 memory in the Ts65Dn mice (Figure 4a). Ts65Dn mice showed fewer alternations than 2N  
691 control mice ( $F(1,18)=23.85$ ,  $p=.0001$   $\eta^2=.29$ ).

692 **Rule Learning on a Plus Maze.** To evaluate inhibitory control and the ability  
693 to learn a turn response (Figure 4b), Ts65Dn mice took significantly longer to learn the  
694 rule than 2N control mice. There was a main effect for groups ( $F(1,76)=4.24$ ,  $p=.013$   
695  $\eta^2=.14$ ), a main effect for block of trials ( $F(1,76)=502.86$ ,  $p<.0001$   $\eta^2=.39$ ). There was  
696 also an interaction among group and block ( $F(1,76)=7.82$ ,  $p=.0065$   $\eta^2=.23$ ). This  
697 interaction was the result of the Ts65Dn mice taking longer to learn the rule. For the final  
698 block of 20 trials, there were no differences in performance for Ts65Dn and 2N control  
699 mice.

700 **Rule Reversal Learning on a Plus Maze.** To evaluate rule reversal learning  
701 (behavioral flexibility) in Ts65Dn mice, the reversal of a turn response was evaluated  
702 (Figure 4c). Ts65Dn mice took a significantly greater number of trials to learn the rule  
703 than 2N control mice. There was a main effect for groups ( $F(1,76)=4.952$ ,  $p=.029$   $\eta^2=.17$ ),  
704 a main effect for block of trials ( $F(1,76)=24.62$ ,  $p<.0001$   $\eta^2=.17$ ). There was also a  
705 nonsignificant interaction among group and block ( $F(1,76)=3.21$ ,  $p=.077$   $\eta^2=.09$ ). Looking  
706 at Figure 4c, the nonsignificant interaction was the result of the Ts65Dn mice taking  
707 longer to learn to reverse the rule. In fact, the Ts65Dn mice were only impaired relative to  
708 the 2N control mice for the first block of 20 trials. For the remaining blocks of trials there  
709 were no differences in performance for Ts65Dn and 2N control mice. There was a main  
710 effect for groups for the trial at which the mice changed preference from old rule to new  
711 rule (changepoint;  $F(1,18)=21.43$ ,  $p=.0002$   $\eta^2=.13$ ); Figure 4d). For the first 20 trials of  
712 reversal learning, Ts65Dn mice showed a greater number of perseverative errors  
713 ( $F(1,18)=11.98$ ,  $p=.0028$   $\eta^2=.13$ ; Figure 4e). For trials 21-40, there was no difference between  
714 Ts65Dn mice and 2N control mice for regressive errors ( $F(1,18)=.287$ ,  $p=.599$   $\eta^2=.02$ ;  
715 Figure 4f).

## 716 **Motor Function**

717 **Capellini Eating Task.** For the capellini task of manual dexterity (Figure 5),  
718 Ts65Dn mice showed significant impairments relative to 2N control mice. There was a  
719 main effect for latency, with Ts65Dn mice taking longer to eat the pasta on average  
720 ( $F(1,18)=14.74$ ,  $p=.0012$   $\eta^2=.17$ ; Figure 5a). Ts65Dn mice also made a greater number of  
721 pasta handling errors ( $F(1,18)=92.68$ ,  $p<.0001$   $\eta^2=.40$ ; Figure 5b). There was also a main  
722 effect for groups for the number of times the paws came together ( $F(1,18)=42.34$ ,  $p<.0001$ ;  
723 Figure 5c), for the number of times the mouse lost contact with the pasta ( $F(1,18)=20.35$ ,  
724  $p=.0003$   $\eta^2=.22$ ; Figure 5d) and the number of times the mouse pulled the pasta with  
725 their mouth rather than using the hands to move it ( $F(1,18)=21.46$ ,  $p=.0002$   $\eta^2=.17$ ;

726 Figure 5e).

727 **Parallel Rung Walking Task.** During a parallel rung walking task (Figure 5f),  
728 Ts65Dn mice showed significant impairments relative to 2N control mice. There was a  
729 main effect for the number of foot slips in a 1 minute session ( $F(1,18)=27.32$ ,  $p<.0001$   
730  $\eta^2=.19$ ). When adjusted for number of steps, Ts65Dn mice still showed a greater number  
731 of foot slip errors ( $F(1,18)=11.70$ ,  $p=.0031$   $\eta^2=.16$ ; Figure 5g).

### 732 **Adaptive Function / Quality of Life**

733 **Nesting Behavior.** Ts65Dn mice showed significant impairments relative to 2N  
734 control mice for measures of nesting (Figure 6). Ts65Dn mice took longer to make contact  
735 with the nesting material ( $F(1,18)=152.9$ ,  $p<.0001$   $\eta^2=.24$ ; Figure 6a), for the time it took  
736 for them to dig in the media (measured from time of first contact) ( $F(1,18)=318.6$ ,  
737  $p<.0001$   $\eta^2=.16$ ; Figure 6b), and the time it took from starting to dig to finish the nest  
738 ( $F(1,18)=94.3$ ,  $p<.0001$   $\eta^2=.21$ ; Figure 6c).

739 **Neophobia.** Ts65Dn mice showed significant impairments relative to 2N control  
740 mice for neophobia (Figure 6). Ts65Dn mice took longer to eat a novel food in a familiar  
741 environment ( $F(1,18)=19.59$ ,  $p=.0003$   $\eta^2=.11$ ; Figure 6d), took longer to eat a familiar  
742 food in a novel environment ( $F(1,18)=40.87$ ,  $p<.0001$   $\eta^2=.16$ ; Figure 6e), and took longer  
743 to eat a novel food in a novel environment ( $F(1,18)=83.74$ ,  $p<.0001$   $\eta^2=.17$ ; Figure 6f).

### 744 **Discussion**

745 Briefly, Ts65Dn mice displayed specific deficits for spatial processing, long-term  
746 memory, motor function, executive function, and adaptive function (Table 1). These  
747 deficits phenocopy the results from the ACTB used in testing children with Down  
748 syndrome, including the report that providing distracting contextual cues may impair  
749 memory function in Down syndrome (Edgin et al., 2010; Edgin et al., 2012; Edgin et al.,  
750 2014).

751 Overall, these data clearly demonstrate that the Ts65Dn mouse do in fact show a  
752 similar pattern of behavioral deficits on the mouse variant of the Arizona Cognitive Task  
753 Battery (mCTB) as individuals with Down syndrome show on the human ACTB. The  
754 task similarities between the mouse and human ACTB are outlined in Table 1. In cases  
755 where Down syndrome participants show deficits on the ACTB (Edgin et al., 2010), the  
756 mice in the present study phenocopy those effects (also *cf.*, Edgin et al. (2012)). Similarly,  
757 the Ts65Dn mice showed the same pattern of strengths (*i.e.*, lack of performance deficits)  
758 as individuals with Down syndrome show on the ACTB.

759 The pattern of Ts65Dn performance on spatial and temporal processing tasks  
760 support the hypothesis that Ts65Dn mice show clear deficits for spatial processing tasks  
761 dependent upon the dentate gyrus with sparing of spatial and temporal processing  
762 dependent upon the CA1 subregion (Goodrich-Hunsaker, Hunsaker, & Kesner, 2008;  
763 Kesner, Lee, & Gilbert, 2004; Kesner & Rolls, 2015; Rolls & Kesner, 2006; Smith et al.,  
764 2014). Similarly, it appears that spatial processing dependent on neocortical processing is  
765 spared (*cf.*, Goodrich-Hunsaker, Hunsaker, and Kesner (2005)). Similar cognitive deficits  
766 have been reported in Down syndrome (Edgin et al., 2012).

767 These findings were confirmed by verifying that any spatial or temporal processing  
768 deficits observed in the presence of distal cues was confirmed in a task that removed these  
769 cues (Dees & Kesner, 2013). The data show that metric/coordinate processing and  
770 location recognition deficits are similar in the presence or absence of distal cues, suggesting  
771 that these hippocampus (more specifically the dentate gyrus) dependent spatial processes  
772 are disrupted. The topological/categorical deficits observed in the clear box are absent  
773 when tested in the absence of extramaze cues in a red box. These data suggest that  
774 CA1/parietal cortex related spatial memory processes are intact when tested without  
775 extra-maze cues available (*cf.*, Kesner et al. (2004), Kesner and Rolls (2015)).

776 Similarly, the temporal ordering deficits present in the clear box were absent in the  
777 red box, and the novelty detection control task showed the same pattern, suggesting

778 temporal processing is intact in the Ts65Dn mice, but object identification may be  
779 impaired if extra-maze distal cues are present. This hypothesis was confirmed in the  
780 sensory/perceptual tests wherein the Ts65Dn mice were able to correctly process feature  
781 ambiguity and feature novelty in the red, but not clear boxes. And finally, object  
782 recognition was impaired even at only 1 hour delays for Ts65Dn mice when extramaze cues  
783 were available. In the red box, the Ts65Dn mice were able to identify previously  
784 encountered objects until a 24 hour delay was imposed.

785 For response learning or executive function, Ts65Dn mice were impaired for  
786 spontaneous alternation (they alternated on fewer trials than wildtype mice), as well as  
787 response learning and reversal learning of a previously learned rule. However, it appeared  
788 that the Ts65Dn mice just learned the tasks more slowly since the early trials show deficit,  
789 but later blocks of trials do not. For reversal learning, it is clear the Ts65Dn mice take a  
790 greater number of trials to learn the reversal based on the changepoint calculated for the  
791 learning curves (Ts65Dn mean=50 compared to mean=30 for 2N wildtype mice) as well as  
792 the greater number of perseverative errors during trials 1-20 of the reversal learning task.  
793 Interestingly, once the Ts65Dn mice showed learning of the reversal, they did not make  
794 any more regressive errors than the 2N control mice.

795 These data support earlier theories that suggested there were specific deficits to  
796 spatial memory in Down syndrome (Carlesimo, Marotta, & Vicari, 1997; Carretti &  
797 Lanfranchi, 2010; Lanfranchi et al., 2009; Silvia Lanfranchi et al., 2004; Vicari et al., 2005;  
798 Visu-Petra, Benga, Miclea, et al., 2007). What these data clarify are the neural substrates  
799 and specific domains of medial temporal lobe function are impaired in Down syndrome.  
800 There are specific deficits on tasks that test dentate gyrus function, but sparing of  
801 function on tasks that test parietal and perirhinal cortices as well as CA1 function.  
802 Similarly, there are specific deficits in the Ts65Dn mouse that are attributable to  
803 cerebellar function and executive functional deficits attributable to the rostral cortices  
804 (analogue of the human prefrontal cortex). For thorough descriptions of neuroanatomic

805 correlates of the behavioral tasks included in the mCTB the reader is referred to the  
806 descriptions of the original tasks (*cf.*, Bartko et al. (2007), Bussey et al. (2002), Kesner  
807 et al. (2004), Kesner and Rolls (2015), Ragozzino et al. (1999), Ragozzino et al. (2002),  
808 Rolls and Kesner (2006)

809 For the motor tasks, the Ts65Dn mice showed clear deficits for handling the capellini  
810 and greater difficulties walking on parallel rungs. For adaptive function, the Ts65Dn mice  
811 took longer to build nests and consume novel foods in novel locations, suggesting reduced  
812 adaptive function or quality of life relative to 2N control mice.

813 An important consideration in adopting a behavioral screen like this mCTB is the  
814 relative throughput for the tasks. All of the tasks used to test medial temporal lobe  
815 function take 30 minutes per session of testing, and can be repeated numerous times on  
816 any given mouse after 24 hours have passed since the first test. The motor and adaptive  
817 function tests are similarly high throughput, as is the spontaneous alternation task. The  
818 only tasks that require a significant time investment are the dry land watermaze (Lopez  
819 et al., 2010) on the cheeseboard and the rule acquisition and rule reversal learning tasks  
820 (Bissonette et al., 2008; Ragozzino et al., 1999; Ragozzino et al., 2002). The dry land  
821 watermaze task on the cheeseboard follows a standard water maze protocol that lasts 5  
822 days, and the response learning and reversal learning tasks together take an additional  
823 week.

824 A second consideration is adopting the mCTB is the advantage of the anatomical  
825 specificity of known neural substrates underlying each behavioral task (Bartko et al., 2007;  
826 Bussey et al., 2002, 2006; Farr et al., 2006; Goodrich-Hunsaker et al., 2005, 2008;  
827 Hunsaker, 2012a; Kesner et al., 2004; Kesner & Rolls, 2015) and previous comparison of  
828 rodent performance on many of the behavioral tasks to human cognitive function  
829 (Baumann, Chan, & Mattingley, 2012; Baumann & Mattingley, 2013; Goodrich-Hunsaker  
830 & Hopkins, 2010; Goodrich-Hunsaker et al., 2005; Kesner & Goodrich-Hunsaker, 2010). As  
831 such, these tasks can be used to dissociate function of brain areas within the mouse



832 models being tested. The final consideration is the lack of negative reinforcement or  
833 aversive stimulus. This means mouse models displaying depression, anxiety, or anhedonia  
834 are theoretically testable using the mCTB (*cf.*, Hunsaker (2012a, 2012b)).

835 An interesting complication emerged in the data that the mCTB was solved by  
836 nature of how it was designed. On a number of nonspatial tasks, there was a confound of  
837 distal cues interfering with the processing of proximal objects that were of interest in the  
838 task. For example, in the temporal ordering and novelty detection for novel objects tasks,  
839 the Ts65Dn mice looked like they had deficits, but only in the clear box that allowed  
840 access to distal cues (Dees & Kesner, 2013; Smith et al., 2014). The feature ambiguity  
841 task and the control condition showed the same pattern. The addition of a distal cue-free  
842 condition (the red box) was essential for separating the effects of proximal-distal cue  
843 interactions from the memory processes being tested by the tasks. The disparate  
844 performance across clear and red boxes (or in presence of absence of extra maze contextual  
845 cues) allowed us to assess the role of context and distracting cues in memory function in  
846 Ts65Dn mice, a conceptual replication of Edgin et al. (2014) in Down syndrome and rats  
847 as shown by Dees and Kesner (2013).

## 848 **Limitations**

849 The primary limitation of the present study is the lack of tests for language or  
850 language like attributes in the Ts65Dn mouse model. However, such assays exist and can  
851 easily be added to the task battery without significantly increasing the amount of time  
852 required to perform the mCTB (Zampieri, Fernandez, Pearson, Stasko, & Costa, 2014).  
853 The present experiment also only assayed the Ts65Dn mouse model of Down syndrome as  
854 a proof of concept. Further studies will be necessary to evaluate whether other mouse  
855 models of Down syndrome (*e.g.*, Ts2Cje, Ts1Yah, and Dep(17)1Yey/+; Das and Reeves  
856 (2011)) show the same pattern of results as the Ts65Dn mouse model. This is not a trivial  
857 issue as there is still controversy as to which of the many genetic models best recapitulate

858 the cognitive phenotype seen in Down syndrome populations.

## 859 **Conclusions**

860 That deficits in the mouse and human ACTB are comparable suggests that the  
861 mCTB may be useful for guiding the development of treatment strategies by providing  
862 reliable, valid behavioral endpoints and outcome measures. These outcome measures  
863 reported in the mCTB appear to show high face, content, and predictive validity with the  
864 ACTB, at least so far as Ts65Dn performance mimics the performance of Down syndrome  
865 patient populations. As we were able to identify such a clear phenotype in Ts65Dn mice,  
866 the mouse mCTB may well turn out to be a useful tool for studying behavioral prodrome  
867 of early Alzheimer-like pathology and cognitive decline in mouse models related to Down  
868 syndrome. Similarly, the mCTB may serve as a powerful and comprehensive screening tool  
869 for preclinical tests of pharmacological interventions in Down syndrome.

870

References

871

872 Bannerman, D., Deacon, R., Offen, S., Friswell, J., Grubb, M., & Rawlins, J. (2002).

873 Double dissociation of function within the hippocampus: spatial memory and

874 hyponeophagia. *Behavioral Neuroscience*, *116*(5), 884.

875 Bartko, S. J., Winters, B. D., Cowell, R. A., Saksida, L. M., & Bussey, T. J. (2007).

876 Perirhinal cortex resolves feature ambiguity in configural object recognition and

877 perceptual oddity tasks. *Learning & Memory*, *14*(12), 821–832.

878 Baumann, O., Chan, E., & Mattingley, J. B. (2012). Distinct neural networks underlie

879 encoding of categorical versus coordinate spatial relations during active navigation.

880 *NeuroImage*, *60*(3), 1630–1637.

881 Baumann, O. & Mattingley, J. B. (2013). Dissociable roles of the hippocampus and

882 parietal cortex in processing of coordinate and categorical spatial information.

883 *Frontiers in Human Neuroscience*, *8*, 73–73.

884 Benjamini, Y., Drai, D., Elmer, G., Kafkafi, N., & Golani, I. (2001). Controlling the false

885 discovery rate in behavior genetics research. *Behavioural Brain Research*, *125*(1),

886 279–284.

887 Bissonette, G. B., Martins, G. J., Franz, T. M., Harper, E. S., Schoenbaum, G., &

888 Powell, E. M. (2008). Double dissociation of the effects of medial and orbital

889 prefrontal cortical lesions on attentional and affective shifts in mice. *The Journal of*

890 *Neuroscience*, *28*(44), 11124–11130.

891 Bussey, T. J., Saksida, L. M., & Murray, E. A. (2002). Perirhinal cortex resolves feature

892 ambiguity in complex visual discriminations. *European Journal of Neuroscience*,

893 *15*(2), 365–374.

894 Bussey, T. J., Saksida, L. M., & Murray, E. A. (2006). Perirhinal cortex and

895 feature-ambiguous discriminations. *Learning & Memory*, *13*(2), 103–105.

- 896 Carlesimo, G. A., Marotta, L., & Vicari, S. (1997). Long-term memory in mental  
897 retardation: evidence for a specific impairment in subjects with down's syndrome.  
898 *Neuropsychologia*, *35*(1), 71–79.
- 899 Carretti, B. & Lanfranchi, S. (2010). The effect of configuration on vswm performance of  
900 down syndrome individuals. *Journal of Intellectual Disability Research*, *54*(12),  
901 1058–1066.
- 902 Connolly, B. H. & Michael, B. T. (1986). Performance of retarded children, with and  
903 without down syndrome, on the bruininks oseretsky test of motor proficiency.  
904 *Physical Therapy*, *66*(3), 344–348.
- 905 Cummings, B. J., Engesser-Cesar, C., Cadena, G., & Anderson, A. J. (2007). Adaptation  
906 of a ladder beam walking task to assess locomotor recovery in mice following spinal  
907 cord injury. *Behavioural Brain Research*, *177*(2), 232–241.
- 908 Das, I. & Reeves, R. H. (2011). The use of mouse models to understand and improve  
909 cognitive deficits in down syndrome. *Disease Models and Mechanisms*, *4*(5), 596–606.
- 910 Dees, R. L. & Kesner, R. P. (2013). The role of the dorsal dentate gyrus in object and  
911 object-context recognition. *Neurobiology of Learning and Memory*, *106*, 112–117.
- 912 Diep, A. A., Hunsaker, M. R., Kwock, R., Kim, K., Willemsen, R., & Berman, R. F.  
913 (2012). Female cgg knock-in mice modeling the fragile x premutation are impaired  
914 on a skilled forelimb reaching task. *Neurobiology of Learning and Memory*, *97*(2),  
915 229–234.
- 916 Edgin, J. O., Mason, G. M., Allman, M. J., Capone, G. T., DeLeon, I., Maslen, C., . . .  
917 Nadel, L. (2010). Development and validation of the arizona cognitive test battery  
918 for down syndrome. *Journal of Neurodevelopmental Disorders*, *2*(3), 149.
- 919 Edgin, J. O., Mason, G. M., Spano, G., Fernandez, A., & Nadel, L. (2012). 7 human and  
920 mouse model cognitive phenotypes in down syndrome: implications for assessment.  
921 *Progress in Brain Research*, *197*, 123.

- 922 Edgin, J. O., Spano, G., Kawa, K., & Nadel, L. (2014). Remembering things without  
923 context: development matters. *Child Development*, *85*(4), 1491–1502.
- 924 Escorihuela, R. M., Fernandez-Teruel, A., Vallina, I. F., Baamonde, C., Lumbreras, M. A.,  
925 Dierssen, M., . . . Florez, J. (1995). A behavioral assessment of ts65dn mice: a  
926 putative down syndrome model. *Neuroscience Letters*, *199*(2), 143–146.
- 927 Faizi, M., Bader, P. L., Tun, C., Encarnacion, A., Kleschevnikov, A., Belichenko, P., . . .  
928 Mobley, W. C., et al. (2011). Comprehensive behavioral phenotyping of ts65dn  
929 mouse model of down syndrome: activation of beta 1-adrenergic receptor by  
930 xamoterol as a potential cognitive enhancer. *Neurobiology of Disease*, *43*(2),  
931 397–413.
- 932 Farr, T. D., Liu, L., Colwell, K. L., Whishaw, I. Q., & Metz, G. A. (2006). Bilateral  
933 alteration in stepping pattern after unilateral motor cortex injury: a new test  
934 strategy for analysis of skilled limb movements in neurological mouse models.  
935 *Journal of Neuroscience Methods*, *153*(1), 104–113.
- 936 Faul, F., Erdfelder, E., Buchner, A., & Lang, A.-G. (2009). Statistical power analyses  
937 using g\* power 3.1: tests for correlation and regression analyses. *Behavior Research*  
938 *Methods*, *41*(4), 1149–1160.
- 939 Faul, F., Erdfelder, E., Lang, A.-G., & Buchner, A. (2007). G\* power 3: a flexible  
940 statistical power analysis program for the social, behavioral, and biomedical sciences.  
941 *Behavior Research Methods*, *39*(2), 175–191.
- 942 Filali, M. & Lalonde, R. (2009). Age-related cognitive decline and nesting behavior in an  
943 appswe/ps1 bigenic model of alzheimer’s disease. *Brain Research*, *1292*, 93–99.
- 944 Frith, U. & Frith, C. D. (1974). Specific motor disabilities in downs syndrome. *Journal of*  
945 *Child Psychology and Psychiatry*, *15*(4), 293–301.
- 946 Gallistel, C. R., Fairhurst, S., & Balsam, P. (2004). The learning curve: implications of a  
947 quantitative analysis. *Proceedings of the National Academy of Sciences*, *101*(36),  
948 13124–13131.

- 949 Gemus, M., Palisano, R., Russell, D., Rosenbaum, P., Walter, S. D., Galuppi, B., &  
950 Lane, M. (2002). Using the gross motor function measure to evaluate motor  
951 development in children with down syndrome. *Physical & Occupational Therapy in*  
952 *Pediatrics, 21*(2-3), 69–79.
- 953 Goodrich-Hunsaker, N. J. & Hopkins, R. O. (2010). Spatial memory deficits in a virtual  
954 radial arm maze in amnesic participants with hippocampal damage. *Behavioral*  
955 *Neuroscience, 124*(3), 405.
- 956 Goodrich-Hunsaker, N. J., Hunsaker, M. R., & Kesner, R. P. (2005). Dissociating the role  
957 of the parietal cortex and dorsal hippocampus for spatial information processing.  
958 *Behavioral Neuroscience, 119*(5), 1307.
- 959 Goodrich-Hunsaker, N. J., Hunsaker, M. R., & Kesner, R. P. (2008). The interactions and  
960 dissociations of the dorsal hippocampus subregions: how the dentate gyrus, ca3, and  
961 ca1 process spatial information. *Behavioral Neuroscience, 122*(1), 16.
- 962 Gottesman, I. I. & Gould, T. D. (2003). The endophenotype concept in psychiatry:  
963 etymology and strategic intentions. *American Journal of Psychiatry, 160*(4),  
964 636–645.
- 965 Hunsaker, M. R. (2012a). Comprehensive neurocognitive endophenotyping strategies for  
966 mouse models of genetic disorders. *Progress in Neurobiology, 96*(2), 220–241.
- 967 Hunsaker, M. R. (2012b). The importance of considering all attributes of memory in  
968 behavioral endophenotyping of mouse models of genetic disease. *Behavioral*  
969 *Neuroscience, 126*(3), 371.
- 970 Hunsaker, M. R. (2013). Neurocognitive endophenotypes in cgg ki and fmr1 ko mouse  
971 models of fragile x-associated disorders: an analysis of the state of the field.  
972 *F1000Research, 2*.
- 973 Hunsaker, M. R. (2016). Applying the attribute model to develop behavioral tasks that  
974 phenocopy human clinical phenotypes using mouse disease models: an

- 975 endophenotyping approach. In *The neurobiological basis of memory* (pp. 337–366).  
976 Springer.
- 977 Hunsaker, M. R., Goodrich-Hunsaker, N. J., Willemsen, R., & Berman, R. F. (2010).  
978 Temporal ordering deficits in female cgg ki mice heterozygous for the fragile x  
979 premutation. *Behavioural Brain Research*, *213*(2), 263–268.
- 980 Hunsaker, M. R., Kim, K., Willemsen, R., & Berman, R. F. (2012). Cgg trinucleotide  
981 repeat length modulates neural plasticity and spatiotemporal processing in a mouse  
982 model of the fragile x premutation. *Hippocampus*, *22*(12), 2260–2275.
- 983 Hunsaker, M. R., von Leden, R. E., Ta, B. T., Goodrich-Hunsaker, N. J., Arque, G.,  
984 Kim, K., . . . Berman, R. F. (2011). Motor deficits on a ladder rung task in male and  
985 female adolescent and adult cgg knock-in mice. *Behavioural Brain Research*, *222*(1),  
986 117–121.
- 987 Hunsaker, M. R., Wenzel, H. J., Willemsen, R., & Berman, R. F. (2009). Progressive  
988 spatial processing deficits in a mouse model of the fragile x premutation. *Behavioral*  
989 *Neuroscience*, *123*(6), 1315.
- 990 Karayiorgou, M., Simon, T. J., & Gogos, J. A. (2010). 22q11. 2 microdeletions: linking dna  
991 structural variation to brain dysfunction and schizophrenia. *Nature Reviews*  
992 *Neuroscience*, *11*(6), 402–416.
- 993 Kesner, R. P., Farnsworth, G., & DiMattia, B. V. (1989). Double dissociation of egocentric  
994 and allocentric space following medial prefrontal and parietal cortex lesions in the  
995 rat. *Behavioral Neuroscience*, *103*(5), 956.
- 996 Kesner, R. P. & Goodrich-Hunsaker, N. J. (2010). Developing an animal model of human  
997 amnesia: the role of the hippocampus. *Neuropsychologia*, *48*(8), 2290–2302.
- 998 Kesner, R. P., Hui, X., Sommer, T., Wright, C., Barrera, V. R., & Fanselow, M. S. (2014).  
999 The role of postnatal neurogenesis in supporting remote memory and spatial metric  
1000 processing. *Hippocampus*, *24*(12), 1663–1671.

- 1001 Kesner, R. P., Lee, I., & Gilbert, P. (2004). A behavioral assessment of hippocampal  
1002 function based on a subregional analysis. *Reviews in the Neurosciences*, *15*(5),  
1003 333–352.
- 1004 Kesner, R. P. & Rolls, E. T. (2015). A computational theory of hippocampal function, and  
1005 tests of the theory: new developments. *Neuroscience & Biobehavioral Reviews*, *48*,  
1006 92–147.
- 1007 Kleschevnikov, A. M., Belichenko, P. V., Faizi, M., Jacobs, L. F., Htun, K., Shamloo, M.,  
1008 & Mobley, W. C. (2012). Deficits in cognition and synaptic plasticity in a mouse  
1009 model of down syndrome ameliorated by gabab receptor antagonists. *The Journal of*  
1010 *Neuroscience*, *32*(27), 9217–9227.
- 1011 Kleschevnikov, A. M., Belichenko, P. V., Villar, A. J., Epstein, C. J., Malenka, R. C., &  
1012 Mobley, W. C. (2004). Hippocampal long-term potentiation suppressed by increased  
1013 inhibition in the ts65dn mouse, a genetic model of down syndrome. *The Journal of*  
1014 *Neuroscience*, *24*(37), 8153–8160.
- 1015 Lanfranchi, S., Carretti, B., Spano, G., & Cornoldi, C. (2009). A specific deficit in  
1016 visuospatial simultaneous working memory in down syndrome. *Journal of Intellectual*  
1017 *Disability Research*, *53*(5), 474–483.
- 1018 Lanfranchi, S. [Silvia], Cornoldi, C., Vianello, R., & Conners, F. (2004). Verbal and  
1019 visuospatial working memory deficits in children with down syndrome. *American*  
1020 *Journal on Mental Retardation*, *109*(6), 456–466.
- 1021 Lee, J. Y., Huerta, P. T., Zhang, J., Kowal, C., Bertini, E., Volpe, B. T., & Diamond, B.  
1022 (2009). Neurotoxic autoantibodies mediate congenital cortical impairment of  
1023 offspring in maternal lupus. *Nature Medicine*, *15*(1), 91–96.
- 1024 Lopez, L. L., Hauser, J., Feldon, J., Gargiulo, P., & Yee, B. (2010). Evaluating spatial  
1025 memory function in mice: a within-subjects comparison between the water maze test  
1026 and its adaptation to dry land. *Behavioural Brain Research*, *209*(1), 85–92.



- 1027 Moore, S. J., Deshpande, K., Stinnett, G. S., Seasholtz, A. F., & Murphy, G. G. (2013).  
1028 Conversion of short-term to long-term memory in the novel object recognition  
1029 paradigm. *Neurobiology of Learning and Memory*, *105*, 174–185.
- 1030 Pennington, B. F., Moon, J., Edgin, J., Stedron, J., & Nadel, L. (2003). The  
1031 neuropsychology of down syndrome: evidence for hippocampal dysfunction. *Child*  
1032 *Development*, *74*(1), 75–93.
- 1033 Ragozzino, M. E., Detrick, S., & Kesner, R. P. (1999). Involvement of the  
1034 prelimbic–infralimbic areas of the rodent prefrontal cortex in behavioral flexibility for  
1035 place and response learning. *The Journal of Neuroscience*, *19*(11), 4585–4594.
- 1036 Ragozzino, M. E., Ragozzino, K. E., Mizumori, S. J., & Kesner, R. P. (2002). Role of the  
1037 dorsomedial striatum in behavioral flexibility for response and visual cue  
1038 discrimination learning. *Behavioral Neuroscience*, *116*(1), 105.
- 1039 Rast, M. M. & Harris, S. R. (1985). Motor control in infants with down syndrome.  
1040 *Developmental Medicine & Child Neurology*, *27*(5), 682–685.
- 1041 Reeves, R. H., Irving, N. G., Moran, T. H., Wohn, A., Kitt, C., Sisodia, S. S., ...  
1042 Davisson, M. T. (1995). A mouse model for down syndrome exhibits learning and  
1043 behaviour. *Nature Genetics*, *11*, 177–184.
- 1044 Rolls, E. T. & Kesner, R. P. (2006). A computational theory of hippocampal function, and  
1045 empirical tests of the theory. *Progress in Neurobiology*, *79*(1), 1–48.
- 1046 Sago, H., Carlson, E. J., Smith, D. J., Kilbridge, J., Rubin, E. M., Mobley, W. C., ...  
1047 Huang, T.-T. (1998). Ts1cje, a partial trisomy 16 mouse model for down syndrome,  
1048 exhibits learning and behavioral abnormalities. *Proceedings of the National Academy*  
1049 *of Sciences*, *95*(11), 6256–6261.
- 1050 Simon, T. J. (2008). A new account of the neurocognitive foundations of impairments in  
1051 space, time, and number processing in children with chromosome 22q11. 2 deletion  
1052 syndrome. *Developmental Disabilities Research Reviews*, *14*(1), 52–58.

- 1053 Smith, G. K., Kesner, R. P., & Korenberg, J. R. (2014). Dentate gyrus mediates cognitive  
1054 function in the ts65dn/dnj mouse model of down syndrome. *Hippocampus*, *24*(3),  
1055 354–362.
- 1056 Stedron, J. M., Sahni, S. D., & Munakata, Y. (2005). Common mechanisms for working  
1057 memory and attention: the case of perseveration with visible solutions. *Journal of*  
1058 *Cognitive Neuroscience*, *17*(4), 623–631.
- 1059 Team, R. C. (2014). R: a language and environment for statistical computing. vienna,  
1060 austria: r foundation for statistical computing; 2013.
- 1061 Tennant, K. A., Asay, A. L., Allred, R. P., Ozburn, A. R., Kleim, J. A., & Jones, T. A.  
1062 (2010). The vermicelli and capellini handling tests: simple quantitative measures of  
1063 dexterous forepaw function in rats and mice. *JoVE (Journal of Visualized*  
1064 *Experiments)*, (41), e2076–e2076.
- 1065 Vale-Martinez, A., Baxter, M. G., & Eichenbaum, H. (2002). Selective lesions of basal  
1066 forebrain cholinergic neurons produce anterograde and retrograde deficits in a social  
1067 transmission of food preference task in rats. *European Journal of Neuroscience*,  
1068 *16*(6), 983–998.
- 1069 Vicari, S. (2006). Motor development and neuropsychological patterns in persons with  
1070 down syndrome. *Behavior Genetics*, *36*(3), 355–364.
- 1071 Vicari, S., Bellucci, S., & Carlesimo, G. A. (2005). Visual and spatial long-term memory:  
1072 differential pattern of impairments in williams and down syndromes. *Developmental*  
1073 *Medicine & Child Neurology*, *47*(05), 305–311.
- 1074 Virji-Babul, N., Kerns, K., Zhou, E., Kapur, A., & Shiffrar, M. (2006). Perceptual-motor  
1075 deficits in children with down syndrome: implications for intervention. *Down*  
1076 *Syndrome Research and Practice*, *10*(2), 74–82.
- 1077 Visu-Petra, L., Benga, O., Miclea, M., et al. (2007). Visual-spatial processing in children  
1078 and adolescents with down's syndrome: a computerized assessment of memory skills.  
1079 *Journal of Intellectual Disability Research*, *51*(12), 942–952.

1080 Warburton, E. C. [E Clea], Baird, A., Morgan, A., Muir, J. L., & Aggleton, J. P. (2001).

1081       The conjoint importance of the hippocampus and anterior thalamic nuclei for  
1082       allocentric spatial learning: evidence from a disconnection study in the rat. *The*  
1083       *Journal of Neuroscience*, 21(18), 7323–7330.

1084 Warburton, E., Baird, A. L., Morgan, A., Muir, J. L., & Aggleton, J. P. (2000).

1085       Disconnecting hippocampal projections to the anterior thalamus produces deficits on  
1086       tests of spatial memory in rats. *European Journal of Neuroscience*, 12(5), 1714–1726.

1087 Zampieri, B. L., Fernandez, F., Pearson, J. N., Stasko, M. R., & Costa, A. C. (2014).

1088       Ultrasonic vocalizations during male–female interaction in the mouse model of down  
1089       syndrome ts65dn. *Physiology & Behavior*, 128, 119–125.

| Domain/Test in ACTB                                                      | Abilities Assessed                              | Analogous Task in mCTB                                        | Ts65Dn performance                                                    |
|--------------------------------------------------------------------------|-------------------------------------------------|---------------------------------------------------------------|-----------------------------------------------------------------------|
| <b><i>Benchmark, General Cognitive Ability</i></b>                       |                                                 |                                                               |                                                                       |
| KBIT-II Verbal Subscale                                                  | Receptive and Productive Language               | <i>not modeled</i>                                            | n/a                                                                   |
| KBIT-II Nonverbal Subscale                                               | Problem Solving                                 | <i>not modeled</i>                                            | n/a                                                                   |
| Scales of Independent Behavior-Revised (SIB-R)                           | Adaptive Function                               | Nesting, Neophobia                                            | <b>deficits for Adaptive Function</b>                                 |
| CANTAB Spatial Span                                                      | Immediate Memory for Spatiotemporal Information | Temporal Order for Visual Objects                             | <b>no deficits for Temporal Order</b>                                 |
| <b><i>Prefrontal Cortex - Executive Function, Response Attribute</i></b> |                                                 |                                                               |                                                                       |
| Modified Dots Task                                                       | Inhibitory Control and Working Memory           | Spontaneous Alternation                                       | <b>deficits for Spontaneous Alternation</b>                           |
| CANTAB IED                                                               | Set Shifting                                    | Rule Response Learning, Rule Reversal Learning                | <b>deficits for Response Learning, deficits for Reversal Learning</b> |
| <b><i>Medial Temporal Lobe - Spatial Attribute</i></b>                   |                                                 |                                                               |                                                                       |
| CANTAB PALS                                                              | Spatial Associative Memory                      | Location Recognition                                          | <b>deficits for Location Recognition</b>                              |
| Virtual Water Maze                                                       | Spatial Memory/Navigation                       | Dry Land Water Maze (Cheeseboard)                             | <b>deficits for Acquisition and Retrieval of Spatial Navigation</b>   |
| <i>not evaluated</i>                                                     | Spatial Relationships                           | Coordinate, Categorical                                       | <b>deficits for Coordinate task, no deficits for Categorical task</b> |
| <b><i>Medial Temporal Lobe - Temporal Attribute</i></b>                  |                                                 |                                                               |                                                                       |
| <i>not evaluated</i>                                                     | Temporal Processing/Sequence Learning           | Temporal Order for Visual Objects                             | <b>no deficits for Temporal Order</b>                                 |
| <b><i>Medial Temporal Lobe - Sensory/Perceptual Attribute</i></b>        |                                                 |                                                               |                                                                       |
| <i>not evaluated</i>                                                     | Object Recognition                              | Feature Ambiguity, Object Recognition, Novel Object Detection | <b>No deficits at 1 hour delay, deficits at 24 hour delay</b>         |
| <b><i>Cerebellum - Motor Function</i></b>                                |                                                 |                                                               |                                                                       |
| Finger Sequencing Task                                                   | Motor Sequencing                                | Capellini Handling                                            | <b>deficits for Motor Sequencing</b>                                  |
| NEPSY Visuomotor Precision                                               | Visuomotor Tracking/Hand-Eye Coordination       | Parallel Rung Walk, Capellini Handling                        | <b>deficits for Motor Coordination</b>                                |
| CANTAB SRT                                                               | Motor Response Time/Attention                   | <i>not modeled</i>                                            | n/a                                                                   |

*Comparison of Arizona Cognitive Task Battery (ACTB) and Mouse Variant Reported in this Manuscript (mCTB). The mCTB was designed to model as many of the functions as the ACTB was designed to tests in humans. Cognitive deficits summarized in the table phenocopy the effects seen in Down syndrome on the ACTB or subsequent follow-up studies (Edgin et al., 2010; Edgin, Mason, Spano, Fernandez, & Nadel, 2012). Similarly, the performance of Ts65Dn mice on the mCTB recapitulates intact cognitive function seen in participants with Down syndrome when tested using the ACTB*

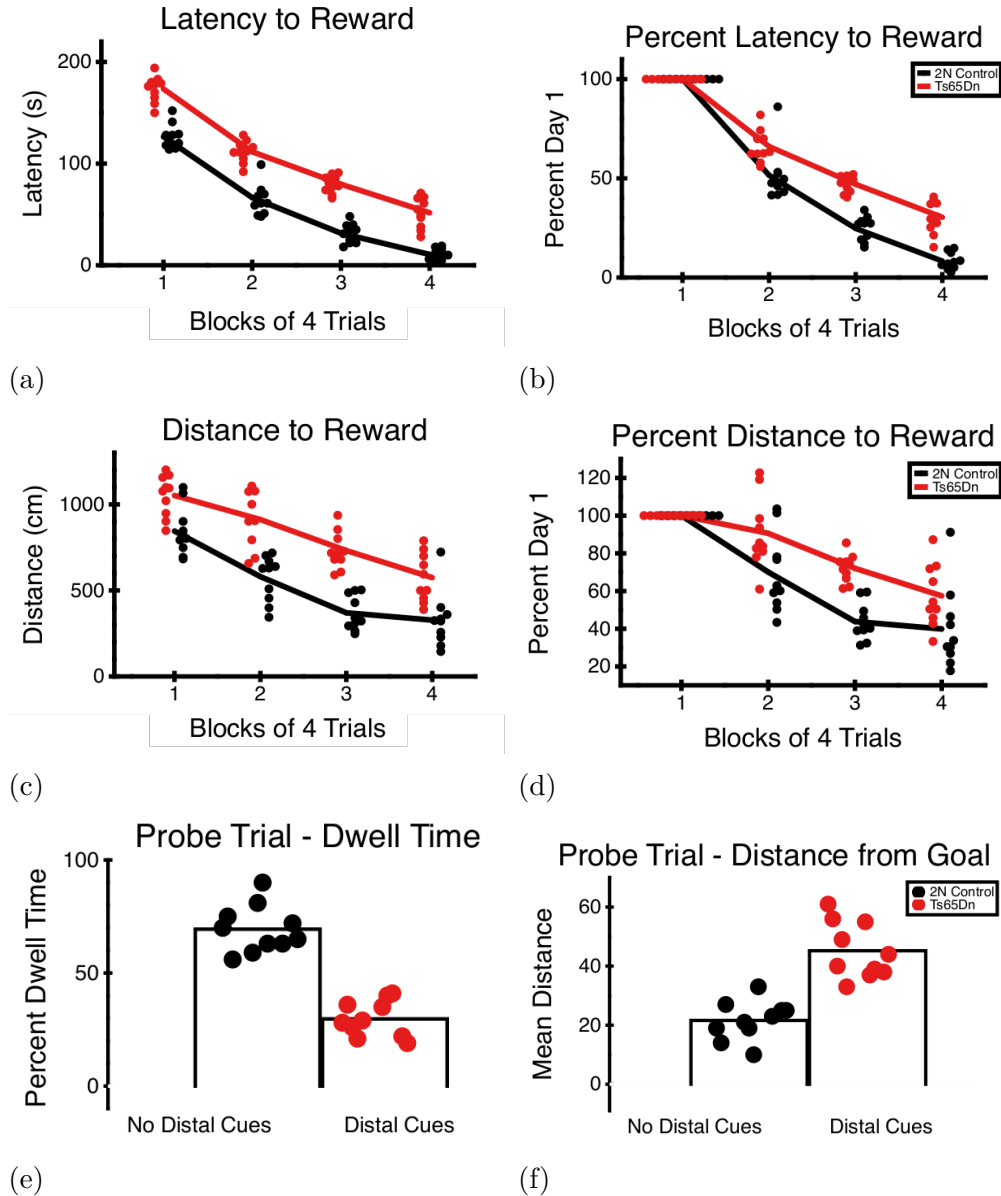

Figure 1. Dry land water maze performance on a cheeseboard for *Ts65Dn* and 2N wildtype control mice. *Ts65Dn* mice showed impaired spatial navigation abilities during the 4 days of acquisition, even when adjusted for initial performance. *Ts65Dn* mice also show spatial memory deficits during the probe trial relative to 2N wildtype control mice, reflected in reduced time in the quadrant containing the reward location and greater average distance from the previously rewarded location compared to 2N control mice. a. Raw latency (s) to reach goal location each day b. Percentage of Day 1 latency to reach goal location c. Raw distance (cm) to reach goal location d. Percentage of Day 1 distance to reach goal location e. Percentage of time during probe in same quadrant as goal location f. Average distance from goal location during probe trial

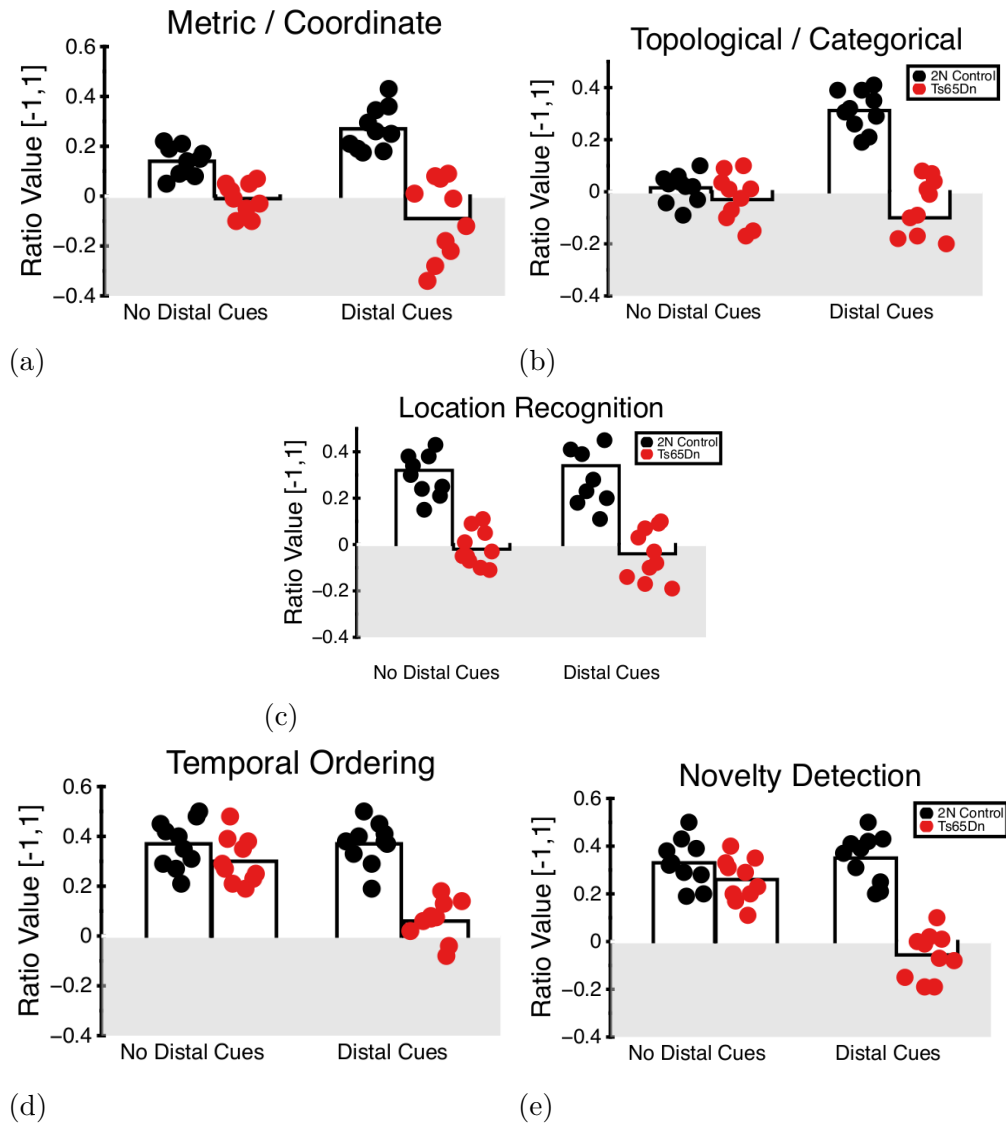

Figure 2. Spatial and Temporal Attribute task battery. The data suggest *Ts65Dn* mice show deficits relative to 2N wildtype control mice for location recognition and metric/coordinate processing, but no deficits for topological/categorical processing. The *Ts65Dn* mice do not show deficits for temporal ordering for visual objects compared to 2N wildtype control mice. a. Performance on a Metric / Coordinate Processing test b. Performance on a Topological / Categorical Processing test c. Performance on a Location Recognition test d. Performance on a Temporal Ordering for Visual Objects test e. Performance on a Novelty Detection for Visual Objects test

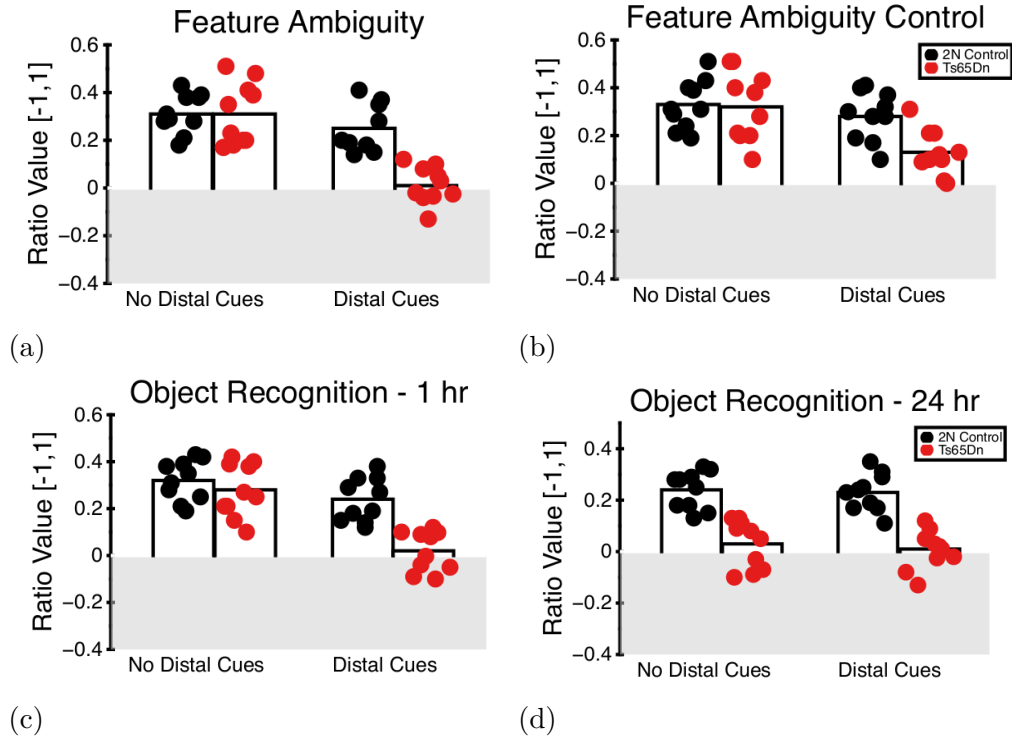

Figure 3. Sensory/Perceptual Attribute task battery. Overall, *Ts65Dn* mice do not show impaired sensory/perceptual function relative to *2N* wildtype mice. *Ts65Dn* mice also do not show deficits for object recognition at a 1 hour delay, but do show deficits for object recognition at 24 hour delays. a. Detection of Visual Object Feature Ambiguity b. Detection of Visual Object Feature Novelty c. Performance on an Object Recognition at 1 Hour Delay test d. Performance on an Object Recognition at 24 Hour Delay test

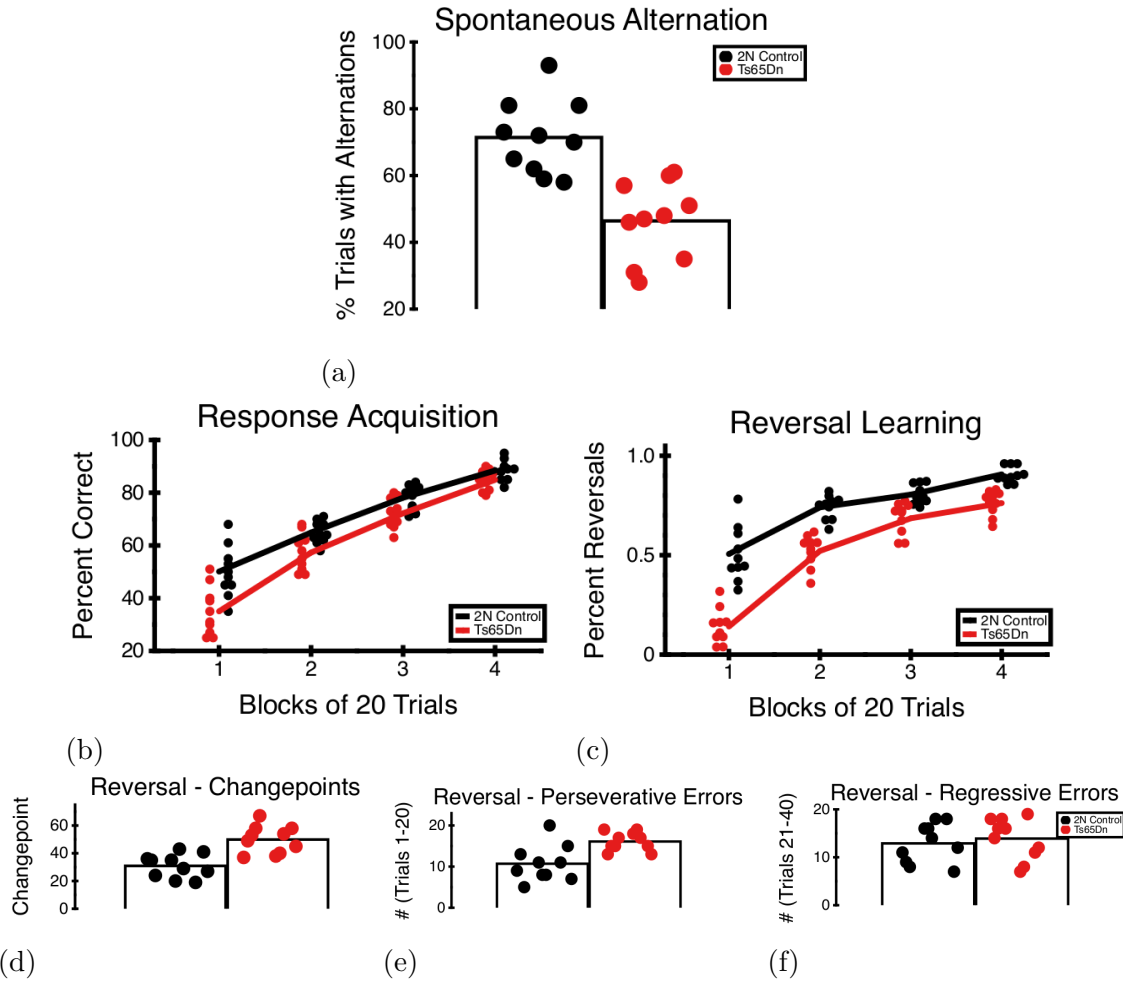

Figure 4. Executive Function / Rule Based Memory Task Battery. Ts65Dn mice show fewer alternations on a spontaneous alternation task relative to 2N control mice. Ts65Dn mice show mild deficits for acquisition and reversal of a rule based response on a plus maze. During reversal training, Ts65Dn mice learn to apply the new rule on later trials than control mice, reflected by an increased number of perseverative, but not regressive, errors. a. Performance on a Spontaneous Alternation test b. Acquisition of a Rule Response on a plus maze c. Acquisition of a Rule Reversal on a plus maze d. Changepoint analysis of Rule Reversal acquisition e. Perseverative Errors during trials 1-20 f. Regressive Errors during trials 21-40



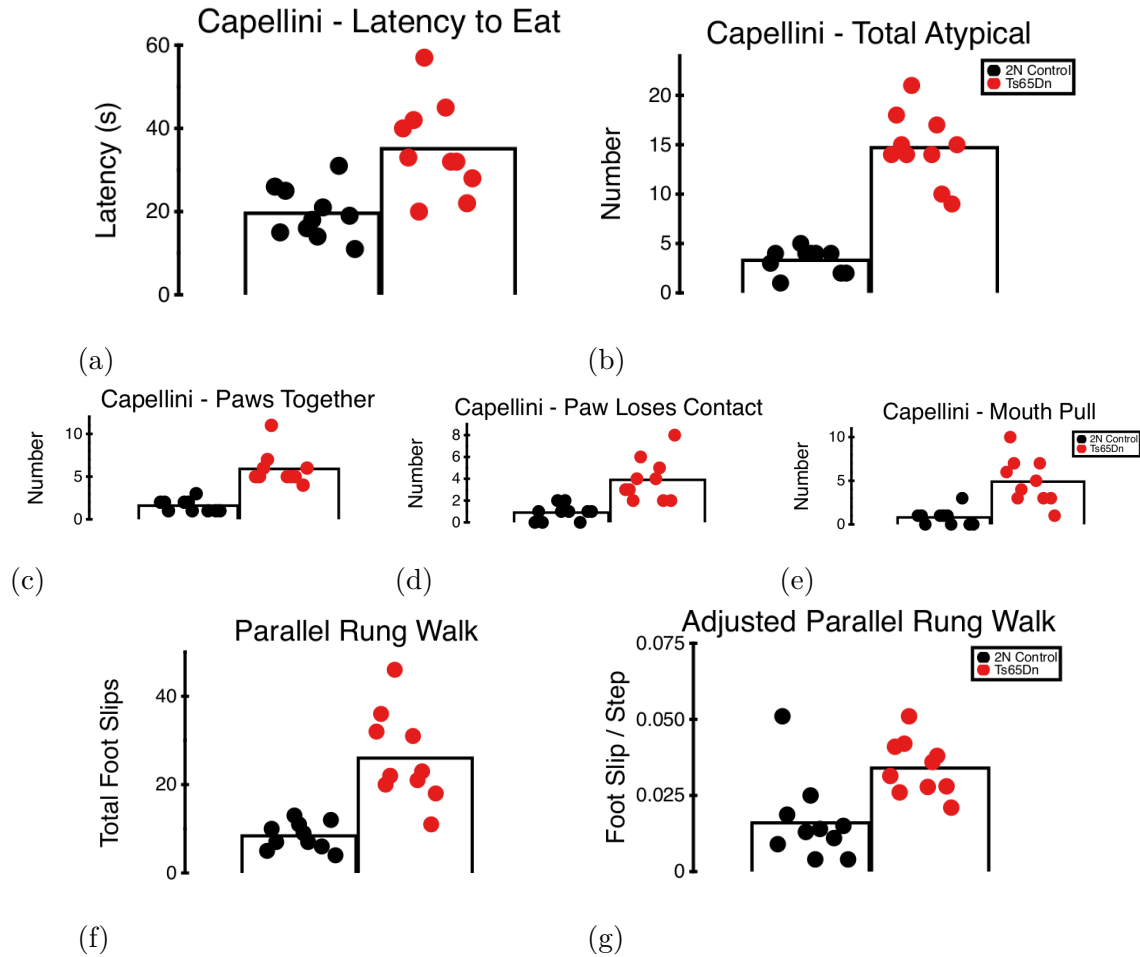

Figure 5. Motor Function Task Battery. *Ts65Dn* mice showed reduced motor dexterity during a Capellini Handling task reflected as an increase in the number of abnormal behaviors and increased latency to consume the capellini as well a greater number of foot slips during a Parallel Rung Walking task, even when adjusted for total number of steps. a. Latency (s) to consume capellini b. Total number of abnormal behaviors c. Number of times paws came together and touched d. Number of times paw lost contact e. Total number of times mouth was used to move capellini f. Total number of foot slips on a Parallel Rung Walking test g. Total number of foot slips when adjusted for total number of steps

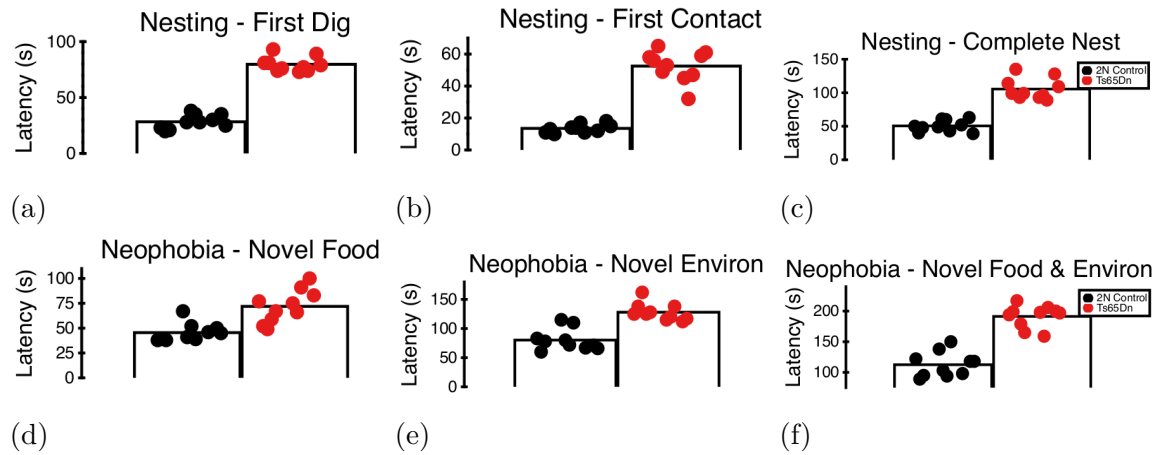

Figure 6. Adaptive Function / Quality of Life Task Battery. *Ts65Dn* mice take longer to make a nest out of preferred nesting material and show increased neophobia for both food and environments. a. Latency (s) to initially contact nesting material. b. Latency (s) to begin digging in nesting material. c. Total latency (s) to finish nest. d. Latency (s) to begin consuming novel food in familiar environment. e. Latency (s) to consume familiar food in novel environment. f. Latency (s) to consume novel food in novel environment
